1 **Decoding temporal interpretation of the morphogen Bicoid in the early *Drosophila***  
2 **embryo**

3 Anqi Huang<sup>1\*</sup>, Christopher Amourda<sup>1\*</sup>, Shaobo Zhang<sup>1</sup>, Nicholas S. Tolwinski<sup>2,3</sup>, and  
4 Timothy E. Saunders<sup>1,3,4</sup>

5 <sup>1</sup>Mechanobiology Institute, National University of Singapore, T-Lab, 5A Engineering Drive 1,  
6 Singapore 117411

7 <sup>2</sup>Division of Science, Yale-NUS College, 12 College Ave West, #01-201, Singapore 138610

8 <sup>3</sup>Department of Biological Sciences, National University of Singapore, 14 Science Drive 4,  
9 Singapore 117543

10 <sup>4</sup>Institute for Molecular and Cell Biology, Agency for Science Technology and Research, 61  
11 Biopolis Dr, Singapore 138673

12 \* These authors contributed equally

13 Correspondence: dbsste@nus.edu.sg

14 **SUMMARY**

15 Morphogen gradients provide essential spatial information during development. Not only the  
16 local concentration but also duration of morphogen exposure is critical for correct cell fate  
17 decisions. Yet, how and when cells temporally integrate signals from a morphogen remains  
18 unclear. Here, we use optogenetic manipulation to switch off Bicoid-dependent transcription  
19 in the early *Drosophila* embryo with high temporal resolution, allowing time-specific and  
20 reversible manipulation of morphogen signalling. We find that Bicoid transcriptional activity  
21 is dispensable for embryonic viability in the first hour after fertilization, but persistently  
22 required throughout the rest of the blastoderm stage. Short interruptions of Bicoid activity  
23 alter the most anterior cell fate decisions, while prolonged inactivation expands patterning  
24 defects from anterior to posterior. Such anterior susceptibility correlates with high reliance of  
25 anterior gap gene expression on Bicoid. Therefore, cell fates exposed to higher Bicoid  
26 concentration require input for longer duration, demonstrating a previously unknown aspect  
27 of morphogen decoding.

## 28 INTRODUCTION

29 Morphogens are molecules distributed in spatial gradients that provide essential positional  
30 information in the process of development (Turing, 1990; Wolpert, 1969). By activating  
31 differential gene expression in a concentration-dependent manner, morphogens instruct the  
32 cells to adopt proper cell fates according to their positions in the developing embryos or  
33 tissues (Gurdon and Bourillot, 2001; Neumann and Cohen, 1997). The impact of a  
34 morphogen gradient on a developing system depends on two characteristics: first, its  
35 information capacity in terms of how many distinct cell types it has an effect on; second, its  
36 transferring precision – in essence, how reproducible cell fates are in different individuals at  
37 given positions. Each of these characteristics depends not only on the local concentration of  
38 morphogen molecules that the cells interpret, but also temporal components of such  
39 interpretation.

40

41 The temporal pattern of morphogen interpretation has been demonstrated in several  
42 vertebrate developing systems. Harfe et al. first proposed that the length of time of  
43 morphogen signalling is critical for correct cell fate specification. They found that during  
44 mouse limb development, cells exposed to Sonic Hedgehog (Shh) morphogen for longer time  
45 develop into digits of more posterior identity (Harfe et al., 2004). Similarly, in chick neural  
46 tube formation the duration of Shh activity is translated into different cell types along the  
47 dorso-ventral axis (Dessaud et al., 2007). In comparison, in fish dorso-ventral patterning it is  
48 not the duration but the timing of BMP signaling that is important for correct cell fate  
49 determination (Tucker et al., 2008). While in some cases the temporal integration of  
50 morphogen signaling is carried out by genetic feedback loops (Dessaud et al., 2010), in many  
51 other systems the underlying mechanism has not been unveiled.

52 As the first protein identified to function as a morphogen, Bicoid (Bcd) patterns the cells  
53 along the antero-posterior axis in the early embryo of the fruitfly, *Drosophila melanogaster*  
54 (Driever et al., 1989). Bcd is maternally deposited and localized at the anterior pole of the  
55 embryo in the form of mRNA (Frohnhofer and Nüsslein-Volhard, 1986). This localized  
56 mRNA is further translated upon fertilization, forming a protein gradient with exponential  
57 decay in concentration along the antero-posterior axis. Fundamentally acting as a  
58 transcription factor, Bcd activates different genes, with the more anteriorly expressed genes  
59 having higher Bcd binding affinity (Struhl et al., 1989). Quantitative studies have shown that  
60 the Bcd gradient is highly dynamic, with nuclear Bcd concentration constantly changing  
61 throughout the first 13 rounds of syncytial cell divisions (Little et al., 2011). It has been  
62 suggested that precise positional information endowed by Bcd gradient at one single time  
63 point suffices to distinguish neighbor cell identities (Gregor et al., 2007a). However, recent  
64 results have motivated intense debate over what is the exact time window when the  
65 information carried by Bcd is interpreted (Bergmann et al., 2007; Gregor et al., 2007b; Liu et  
66 al., 2013; Lucchetta et al., 2005).

67

68 To address this question, fast and reversible temporal manipulation of Bcd activity is required.  
69 In this study, we have developed an optogenetic tool to control Bcd-dependent transcription  
70 in the early *Drosophila* embryo with high temporal resolution. Using this tool, we provide a  
71 detailed dissection of the temporal components of Bcd decoding *in vivo*. The results unveil an  
72 unexpected temporal pattern of Bcd action – cell fates determined by higher Bcd  
73 concentration require Bcd for longer duration, while cells experiencing lower Bcd dosage  
74 commit to correct fates at earlier developmental stages. Further combining temporal  
75 perturbation with quantitative analyses, we find that the differential expression kinetics of  
76 target genes can partly explain the mechanism underlying such temporal interpretation.

## 77 RESULTS

### 78 **Precise temporal control of Bcd-dependent transcription via optogenetic manipulation**

79 We built a light-responsive construct to switch off Bcd-dependent transcription by fusing the  
80 optogenetic cassette cryptochrome 2 (CRY2) together with mCherry (mCh) to the N-terminus  
81 of Bcd (Kennedy et al., 2010) (Figure 1A). We used standard P-element transformation to  
82 insert this CRY2::mCh::Bcd construct at different genomic loci generating diverse fly lines  
83 expressing this fusion protein at various levels under the control of the endogenous bcd  
84 regulatory sequences.

85

86 We find that in the dark, CRY2::mCh::Bcd transgenics rescues the absence of endogenous  
87 Bcd. The expression patterns of four gap genes – *hunchback* (*hb*), *giant* (*gt*), *krüppel* (*kr*) and  
88 *knirps* (*kni*) – are reminiscent of wild-type embryos when the light-responsive Bcd construct  
89 is expressed in an otherwise *bcd* mutant background (Figures 1B-1E). These embryos  
90 hatched as healthy larvae (Figure 1F). In comparison, embryos illuminated with blue light  
91 during the first 2.5 hours after egg deposition show severe defects in the anterior, Bcd-  
92 dependent, expression domains of *hb*, *gt* and *kni*, while their posterior counterparts remain  
93 intact (Figures 1G, 1H, and 1I). Furthermore, the Kr band shifts anteriorly when compared to  
94 the pattern observed in the dark (Figures 1E and 1J, arrowheads). Illuminated embryos fail to  
95 develop the head and thorax structures (Figure 1K), resembling the *bcd* knockout phenotype  
96 (Figure 1L). Altogether, these data indicate that the blue light-induced conformational change  
97 of CRY2 inhibits Bcd-dependent gene expression. We quantified the Bcd gradient under dark  
98 and illuminated conditions (Figures 1M and 1N) and observed no significant change in Bcd  
99 profile (Figure 1O), showing that the spatial distribution of Bcd molecules is not affected by  
100 our manipulation. Besides acting as a transcription factor, Bcd also represses translation of  
101 Caudal (Cad) mRNA at the anterior region of the embryo. Remarkably, we saw no shift in

102 Cad gradient in illuminated embryos when compared to those in the dark (Figures 1P-1R),  
103 suggesting that light-induced conformational changes did not alter the translation inhibitory  
104 capability of Bcd in the cytoplasm. This allows us to dissociate transcriptional and  
105 translational roles of Bcd.

106

107 Next we tested whether CRY2::mCh::Bcd under illumination inhibits transcription in a  
108 dominant negative manner. We selected two fly lines expressing CRY2::mCh::Bcd at  
109 comparatively lower and higher levels in a *bcd* wild-type background, denoted by CRY2<sup>low</sup>  
110 and CRY2<sup>high</sup>, respectively (Figures S1A and 1B) and utilized the MS2 system to visualize  
111 the transcriptional activity of the Bcd target gene *hb* (Garcia et al., 2013; Lucas et al., 2013).  
112 Compared to wild-type embryos - where transcriptional activity of *hb* in the Bcd-dependent  
113 anterior domain persists throughout the interphase of nuclear cycle (n.c.) 13 ( $7.1 \pm 3.2$  min;  
114 Figures 2A and 2B, Movie S1) - CRY2<sup>low</sup> embryos show significantly reduced transcriptional  
115 persistence when illuminated with a 488 nm laser ( $3.6 \pm 1.1$  min; Fig.2a, c). Such an  
116 inhibitory effect becomes more prominent in CRY2<sup>high</sup> embryos ( $3.0 \pm 0.5$  min, Figures 2A  
117 and 2D). The transcription of the posterior *hb* domain is Bcd-independent and, reassuringly,  
118 we do not observe any inhibitory effect in this domain ( $4.3 \pm 2.0$  min,  $5.2 \pm 3.3$  min, and  $4.2$   
119  $\pm 2.0$  min in control, CRY2<sup>low</sup>, and CRY2<sup>high</sup>, respectively; Figure 2E). Further, the inhibitory  
120 effect for the same genetic background and illumination conditions is uniform along the AP  
121 axis (Figures S1C and S1D). As parallel evidence, ChIP-qPCR experiments show comparable  
122 CRY2::mCh::Bcd binding in dark or light to native Bcd binding sites (Figure 2F), with no  
123 noticeable unspecific DNA binding caused by light-induced conformational changes (Figure  
124 2G).

125 We then explored the effect of tuning the inhibition of Bcd-dependent transcription by  
126 varying the blue-light illumination intensity. We illuminated embryos with blue light at

127 different powers (0.04, 0.4 and 4 mW) during the hour prior to gastrulation. We used the  
128 Even-skipped (Eve) pattern, where Eve stripes 1 and 2 are Bcd-dependent and more posterior  
129 stripes are Bcd-independent as a readout of Bcd activity (Frasch and Levine, 1987;  
130 Stanojevic et al., 2016). In a WT background, low power illumination (0.04 mW) causes a  
131 moderate reduction and a slight anterior shift of the Eve stripes 1 and 2 expression (Figures  
132 2H and 2I). Increasing light power further decreases the expression level of the first two Eve  
133 stripes (Figures 2J and 2K). When expressed in a *bcd* null background, CRY2::mCh::Bcd  
134 completely inhibits the expression of the anterior two Eve stripes, even at the lowest light  
135 power tested (Figures 2L and 2O).

136

137 Putting the above results together, blue light illumination induces a light-sensitive  
138 conformational change of the N-terminal CRY2, resulting in the inhibition of Bcd-dependent  
139 target gene transcription by, potentially, hindering the assembly of the transcription  
140 machinery. CRY2::mCh::Bcd under illumination competes with wild-type Bcd protein for  
141 binding to the native Bcd DNA binding sites, therefore acting as a dominant negative  
142 transcription factor. This inhibitory effect was stronger in a *bcd* null background, likely due  
143 to the lack of competitive binding. These effects were reversible upon returning to a dark  
144 state (see results below and references Guglielmi et al., 2015; Kennedy et al., 2010). Finally,  
145 the light-induced conformational change does not affect Bcd's role in translational repression  
146 of *Cad* mRNA. This may be one of the reasons that gap gene expression in illuminated  
147 embryos does not perfectly recapitulate that in *bcd* null embryos, where both Bcd  
148 transcriptional and translational effects are lost (Figure S2).

149

## 150 **Persistent Bcd transcription activity is indispensable to embryonic viability**

151 Bcd confers robust cell fate decisions by activating hierarchical segmentation gene networks  
152 (Jaeger et al., 2004; Kraut and Levine, 1991; Manu et al., 2009). Previous studies have shown  
153 that only at early n.c. 14 is the absolute Bcd concentration interpreted as positional  
154 information. In late n.c. 14, on the contrary, expression boundaries of downstream genes are  
155 subjected to cross-regulation and the Bcd gradient is believed to no longer be important (Liu  
156 et al., 2013). To determine whether Bcd-dependent transcription in late n.c. 14 is actually  
157 irrelevant for cell fate determination, we collected embryos laid by females expressing  
158 CRY2::mCh::Bcd in a *bcd* null background (CRY2<sup>high</sup>, *bcd*<sup>-</sup>; in all following experiments  
159 unless otherwise stated) and illuminated them before the initiation of gastrulation for time  
160 windows ranging from 10 to 60 minutes (Figure 3A). Surprisingly, 10 minutes of  
161 illumination at the end of n.c. 14 is sufficient to induce embryonic lethality. Cuticle  
162 preparation of these non-hatched embryos shows defective mouthparts, in particular the  
163 pharynx (Figures 3B and 3C, arrows). In addition, the structures between mouth hooks and  
164 cephalo-pharyngeal plates are missing (Figure 3C, arrowhead). Thirty minutes of  
165 illumination causes further deterioration in mouth development, with minimal mouth skeleton  
166 visible (Figure 3D). Extending the illumination window depletes all mouthparts (Figures 3E  
167 and 3F), with the most severe phenotypes observed when illumination encompasses both n.c.  
168 13 and n.c. 14. Under this condition, all thorax segments are lost, with only abdominal  
169 denticle belts remaining (Figure 3F).

170

171 Transcripts of Bcd target genes have been detected using *in situ* hybridization at time points  
172 as early as n.c. 7 (Ali-Murthy and Kornberg, 2016). We tested whether such early Bcd-  
173 dependent transcription was essential for embryonic viability by illuminating embryos during  
174 early developmental stages (*i.e.* before n.c. 14) and reverting them later to dark conditions to

175 recover Bcd-dependent transcription. We find that a 30-minute illumination window  
176 spanning n.c. 11~13 results in severe patterning defects (Figure 3G), phenocopying the  
177 embryos illuminated during n.c. 13 and 14 (Figure 3F). This suggests that Bcd-dependent  
178 transcription before n.c. 14 is indispensable for initiating its downstream gene cascade.  
179 Shifting the 30-minute illumination period to 10 minutes earlier results in the recovery of  
180 proper thoracic segment patterning (Figure 3H, arrowhead). As the illumination time window  
181 is shifted sequentially earlier, more thorax and mouthparts are successively recovered  
182 (Figures 3I-3K). Last, when the illumination time window is shifted before n.c. 10 (Figure  
183 3K), the cuticle patterns become equivalent to those of embryos developed in the dark  
184 (Figure 3B) and, moreover, the larval hatchability reaches that of dark conditions.

185

186 These temporal perturbation experiments reveal that persistent Bcd-dependent transcription  
187 activity from n.c.10 is required for robust embryonic patterning, and ultimately embryonic  
188 viability. In contrast, formation of the more posterior, thoracic segments is only perturbed  
189 when extended illumination covers n.c.13, the critical time window for properly initiating the  
190 downstream gene cascade.

191

### 192 **Anterior cell fates require Bcd-dependent transcription for longer duration**

193 Deprivation of Bcd-dependent transcription in late blastoderm stages leads to embryonic  
194 lethality, due to errors in cell fate determination. To determine which cell fates are altered by  
195 the lack of Bcd function (Figure 4A), we fixed illuminated  $CRY2^{\text{high}}$ , *bcd* embryos at the end  
196 of germband extension (GBE, 4 hours after gastrulation initiates) and analyzed the expression  
197 of Engrailed (En) and various Hox genes. The most anterior morphological features that can  
198 be observed at GBE are the clypeolabrum lobe at the very tip of the embryo and the  
199 invagination of stomodeum (Figure 4B, red and orange dots, respectively). Blue-light



200 illumination for 10 minutes before gastrulation impairs the formation of these very anterior  
201 structures while the expression of the more posterior En stripes remains intact (Figure 4C).  
202 Extending illumination to 30 minutes prior to gastrulation, we observe the loss of the next  
203 two En stripes marking the mandibular (Mn) and maxillary (Mx) segments (Figure 4D).  
204 Concomitantly, we observe diminished expression of Deformed, a Hox gene that controls  
205 morphogenesis of these same Mn and Mx segments (Figure 4D'). This suggests that  
206 presumptive Mn and Mx cells commit to alternative cell fates. Similarly, 50 minutes of  
207 illumination prior to gastrulation results in the loss of expression of Sex Comb Reduced (Scr),  
208 the hox gene that regulates development of the labial segment (Figures 4E' and 4E''). This  
209 correlates with the loss of the En stripe marking this very same segment (Figure 4E). Further  
210 extending illumination, we observe that anterior cells adopt posterior cell fates, reflected in  
211 the ectopic expression of Ultrabithorax (Ubx) and Abdomen-B (Abd-B) in anterior regions  
212 (Figures 4E'', 4F'' and S3F'', arrows). In the most severe case, we see that all En segments  
213 from the anterior to the third thorax (T3) are missing (Figure 4F).

214

215 Sequential disappearance of En stripes from anterior to posterior correlates with prolonged  
216 illumination at the end of the blastoderm stage. This evidence shows that more anterior cell  
217 fates require Bcd-dependent transcription to persist until the very end of n.c. 14. In contrast,  
218 cells in more posterior regions undergo correct fate decisions at earlier stages, regardless of  
219 the Bcd transcription activity at later time points.

220

### 221 **Temporal dissection of Bcd target gene expression**

222 To gain deeper insight into the molecular basis of the spatio-temporal readout dependence on  
223 Bcd, we investigated how deprivation of Bcd-dependent transcription at different time  
224 windows affects downstream gap gene expression. To this end, we inhibited Bcd-dependent

225 transcription at precise time windows (Figure 5A), then fixed these embryos at the end of the  
226 blastoderm stage, and stained them for a range of gap genes.

227

228 First, we looked at the gap gene *hb*. Our live imaging (Figures 2A-2E) reveals that  
229 illumination significantly reduces the transcription activity of the *hb* anterior domain.

230 Surprisingly, illumination during the last 30 minutes of the blastoderm stage does not affect

231 Hb in neither protein level nor boundary position (Figure 5B), indicating that Hb expression

232 is independent of the newly synthesized mRNA in the last 30 minutes of n.c. 14. This shows

233 that the Hb protein level remains stable once the *hb* mRNA amount has exceeded a certain

234 threshold value. However, extending illumination throughout n.c. 14 (or even earlier) results

235 in deviations of the Hb anterior pattern (Figures 5B, arrows; and S4B4). It has previously

236 been reported that the Hb pattern due to the activity of the *hb* stripe enhancer at the posterior

237 border evolves during n.c. 14 from a shallow and broad gradient to a steep and sharp one

238 (Perry et al., 2011, 2012). Here, we show that the mRNA synthesized prior to n.c. 14 is

239 sufficient to support the formation of the broad gradient, as demonstrated by the Hb

240 expression profile in embryos illuminated throughout cycle 14 (Figure 5B, curve 4).

241 Transcriptional activity in the first 15 minutes of n.c. 14 is hence critical for precise

242 formation of the wild-type Hb expression profile, at both anterior and posterior (driven by the

243 stripe enhancer) borders. Further, continuous illumination throughout n.c. 13 and n.c. 14

244 severely impairs the anterior Hb expression level (Figures 5C and S4B5), showing that

245 mRNA synthesized during n.c. 13 contributes significantly to the final Hb pattern.

246 Interestingly, recovering the transcriptional activity during the last 30 minutes of n.c. 14 by

247 reverting the embryos to the dark, results in a partial rescue of Hb anterior expression (Figure

248 5C, arrow), supporting the presence of a *hb* mRNA threshold. Nevertheless, transcription

249 activity in late n.c. 14 fails to recover the stripe enhancer activity (Figure 5C, curve 1 and 6),

250 potentially due to shifted borders of posterior repressive factors. Next, we tested the  
251 contribution of *hb* transcription prior to n.c.13. Illumination during n.c. 10-12 results in a  
252 steep but narrow Hb gradient, where the posterior boundary shifts anteriorly by ~10% EL  
253 (Figure 5D). Illumination carried out before n.c. 11 results in a recovery of the shape of the  
254 Hb gradient when comparing to that of dark conditions, although the posterior border is still  
255 anteriorly shifted by 5% EL (Figures 5D, curve 8 and 5E-F, anterior shift indicated by red  
256 dashed line). This suggests that the production of zygotic *hb* transcription during n.c. 10-12  
257 plays a critical role in *hb* auto-regulation, affecting the boundary positions of the mature Hb  
258 pattern. Therefore, we can temporally dissect Bcd-dependent activation of Hb, including  
259 separating the contributions from different enhancers.

260

261 The expression of the gap genes Kr (58-45% EL) and Kni (45-37% EL) is subjected to fine-  
262 tuning by Bcd-dependent transcription (in combination with Hb) (Hoch et al., 1991;  
263 Hülkamp et al., 1990). We find that the anterior boundary of Kr shows very high sensitivity  
264 to Bcd transcriptional inhibition - 20 minutes of illumination during the end of n.c. 14 causes  
265 an anterior shift by 3% EL, slightly widening the Kr domain (Figure 5G, 2, blue dot). Both  
266 the anterior and posterior borders of the Kr expression domain shift anteriorly upon  
267 illumination conditions 4, 5 and 6 (Figure 5G), correlating with the shift of the Hb boundary  
268 (Figures 5B curve 4 and 5C, curves 5 and 6). The strongest anterior shift of Kr boundaries is  
269 observed when embryos are reverted to dark after early illumination (Figure 5G, curve 6 and  
270 7), as repressive Hb expression is anteriorly shifted (Figures 5C, curve 6 and 5D, curve 7)  
271 while Bcd transcriptional activity is recovered. The Kni anterior boundary shifts in  
272 correspondence with the posterior Kr boundary shifts, while its posterior boundary is much  
273 less sensitive (Figure 5H). In summary we find that the more anterior expression boundaries  
274 are located, the more susceptible they are to temporal inhibition of Bcd-dependent

275 transcription. Further, we find that a tight temporal interplay between Bcd and Hb is required  
276 for the precise positioning of gap gene expression boundaries.

277

### 278 **Spatio-temporal atlas of Bcd decoding**

279 We now construct a novel spatio-temporal atlas of Bcd-dependent gene transcription in the  
280 early *Drosophila* embryo, with clear time windows for gene activation (Figure 6A). A  
281 minimal 20-minute illumination at the end of n.c. 14 abolishes the expression of the Knirps  
282 anterior domain (Kni1) capping the tip of the embryo (Figures 6B and 6B'), as well as the  
283 first Giant stripe (Gt1) (Figures 6C and 6C'). Extending the Bcd inactivation across n.c. 14  
284 further inhibits the gap gene expression domains located slightly more posterior,  
285 Orthodenticle (Otd) and the second Gt stripe (Gt2) (Figures 6C'', 6D and 6D'). Recovery of  
286 transcription activity in late stages fails to rescue the expression of most of these anterior gap  
287 gene domains (Figures S4C6, S4D6 and S4F6). When Bcd-dependent transcription is  
288 inhibited during n.c. 10-12 and then embryos returned to dark from n.c. 13, the time window  
289 for transcriptional recovery (approximately 1 hour) is insufficient to rescue the expression  
290 patterns of Kni1, Gt1 and Otd (Figures S4C7, S4D7, S4F7). This supports a mechanism  
291 whereby Bcd-dependent transcription serves a priming role prior to n.c. 13 to activate  
292 anterior segmentation genes at later stages. Such a priming role is stage-specific, as it is not  
293 compensated by late recovery of Bcd transcriptional activity. In comparison, illumination for  
294 30 minutes before n.c. 10 has no apparent impact on segmentation gene expression (Figures  
295 S4B8-S4G8), corroborating previous results (Figure 3) indicating that Bcd-dependent  
296 transcription in this time window is dispensable for embryonic viability.

297

298 The reliance of the most anterior gap gene expression (Kni1, Gt1, and Otd) on persistent Bcd-  
299 dependent transcription may explain our previous observations that inhibiting Bcd

300 transcriptional activity both at very late or early stages impairs the proper formation of the  
301 anterior-most segments (Figures 3C, 3J and 4C). Any short interruption of Bcd  
302 transcriptional activity (from n.c. 10 till the very end of n.c. 14) abolishes the activation or  
303 maintenance of gap gene expression domains. As they lie on top of the hierarchical gene  
304 network defining cell fates, their loss alters cell fate decisions and leads to morphological  
305 defects. Comparatively, the expression of gap gene domains at posterior positions is less  
306 susceptible to perturbations in Bcd function. Consequently, cells arising from these domains  
307 still commit to correct fates under Bcd deprivation at early or late stages, as reflected in Hox  
308 gene expression patterns. We summarize this spatio-temporally coordinated Bcd  
309 interpretation in Figure 6E. The more anterior structures, which have cell fates governed by  
310 high Bcd concentration, require Bcd for an extended period of time. On the contrary, cells at  
311 positions responding to low Bcd require a markedly shorter time window of exposure to Bcd  
312 activity to commit to cell fates appropriate for their spatial position.

## 313 **Discussion**

314

### 315 **Optogenetic manipulation of transcription activity *in vivo***

316 Several recent studies have used elegantly designed optogenetic systems to unveil the  
317 temporal role of signalling pathways in embryonic cell fate induction (Johnson et al., 2017;  
318 Sako et al., 2016). As a common strategy, an ubiquitously expressed construct is utilized to  
319 activate the upstream components of the signalling pathway in a light-responsive manner. In  
320 this study, we developed and characterized an optogenetic tool to temporally switch on and  
321 off of the transcriptional activity of the morphogen protein Bcd. In contrast to the previous  
322 approaches, our light-sensitive protein CRY2::mCh::Bcd is present in the spatial distribution  
323 of a native Bcd gradient. While the protein remains transcriptionally active in the dark, blue-  
324 light induced conformational change of N-terminal CRY2 abolishes all direct target gene  
325 expressions instantaneously. As such conformational change does not affect the DNA  
326 binding specificities (Figures 2F-2G) or the spatial localization of the protein (Figure 1O), we  
327 conclude that the inhibitory effect results from failure of transcriptional machinery assembly  
328 due to conformational hindrance. It remains unclear whether such hindrance is caused by the  
329 CRY2 conformational change alone or the effects of light-induced CRY2 oligomerization. It  
330 will be of general interest to further explore if the N-terminal CRY2 exerts transcriptional  
331 inhibition when tagged with other transcription factors, so that our optogenetic approach can  
332 be more widely applied to understand the temporal readout of spatially distributed  
333 transcription factors.

334

### 335 **The temporal pattern of Bcd signal integration is spatially inhomogeneous**

336 The continuous transitions between cell states in a developing embryo are governed by both  
337 the transcriptional landscape and the transcriptional history of the cells. Therefore, not only

338 the local concentrations of the combinatorial transcription factors but also the timing and  
339 duration of their presence are essential for the correct cell fate decisions. Bcd in the early fruit  
340 fly embryo provides the very initial positional cues along the antero-posterior axis,  
341 differentiating cells spanning ~10 embryonic segments (Driever et al., 1989). The gradient  
342 profile of Bcd is highly dynamic throughout the blastoderm stage, with no clear steady-state  
343 (Little et al., 2011). Such dynamics make the temporal aspects of Bcd interpretation critical  
344 for precise decoding of the morphogen. A previous study quantified the temporal evolution of  
345 Bcd dosage at several gap gene expression boundaries, and deduced that the absolute Bcd  
346 concentration is read out during early n.c. 14 (Liu et al., 2013). In comparison data-driven  
347 models propose a much wider time window for Bcd readout, as decoding the gradient earlier  
348 in development (Bergmann et al., 2007) or during its degradation in n.c. 14 (Verd et al.,  
349 2017) gives rise to more accurate predictions of gap gene expression patterns. Direct testing  
350 of these ideas has previously been difficult due to a lack of temporal manipulation of Bcd  
351 activity.

352  
353 Consistent with previous studies, we find that the time window ranging from n.c. 13 to early  
354 n.c. 14 is indeed most critical for Bcd-dependent patterning of downstream genes;  
355 deprivation of Bcd transcriptional activity during this period leads to severe patterning  
356 defects in all the Bcd-dependent embryonic regions, from the most anterior to mesothoracic  
357 segment (Figures 3F-3G). On the other hand, Bcd activity in this critical time window is  
358 sufficient for the proper cell fate induction in mesothorax, regardless of Bcd activity in rest of  
359 the time points throughout the blastoderm stage. Further, the more anterior the cells locate,  
360 the wider time window of Bcd activity is required (Figure 3), as in the extreme case, the  
361 proper formation of the most 'needy' clypeolabrum segment, patterned by the highest Bcd

362 concentration, requires Bcd-dependent transcription from n.c. 10 to the very end of n.c. 14  
363 (Figures 4B-4C).

364 Similar correlations between morphogen concentration and required duration have been  
365 observed in Shh patterning of the vertebrate neural tube (Dessaud et al., 2007). Shh signalling  
366 is temporally integrated by a genetic feedback loop that leads to desensitization of cells to  
367 Shh signal over time. In this way, the duration of Shh input is translated into differential gene  
368 expression. Considering the rapid establishment Bcd target gene expression patterns, it is  
369 unlikely that the same mechanism is utilized here. Our quantitative analysis on gap gene  
370 expression stand in line with two alternative mechanisms underlying such temporal  
371 integration: (1) The anterior gap genes have slower transcription rates than the posterior gap  
372 genes, therefore they require Bcd for longer duration. A recent study has proposed a role of  
373 transcription kinetics in shaping the timing as well as the spatial range of morphogen  
374 response (Dubrulle et al., 2015). Here, we find that the mRNA production and protein  
375 turnover of the anterior gap genes are in a tight balance. Once this balance is tipped by  
376 inhibiting transcription even for a short period of time, the protein expression can no longer  
377 be maintained (Figure. 6A-6D). In contrast, inhibiting the transcription of more posterior  
378 genes, such as *hb*, in mid to late n.c. 14 does not affect their expression, potentially due to an  
379 excessive mRNA pool. (2) Bcd-dependent transcription serves as a priming role in early  
380 stages for proper expression of anterior gap genes. Restoring native Bcd dosage in later  
381 stages fails to initiate *bona fide* gene expression in the very anterior domains, suggesting that  
382 cells are no longer competent to adopt anterior-most cell fates. Whether Bcd primes cell  
383 competency by chromosomal remodeling to increase accessibility (Blythe and Wieschaus,  
384 2016) or inhibiting the otherwise ectopically expressed repressive factors must be subjected  
385 to further investigation.

386



### 387 **Temporal interpretation ensures developmental precision by buffering noises**

388 What role does temporal coordination of morphogen interpretation play in achieving precise  
389 cell fate determination? In *Drosophila* - as in all long germband insects - the embryonic  
390 segments emerge simultaneously (Sander, 1976). Bcd-dependent cell fate specification  
391 appears to move from posterior towards the anterior in a sequential manner. The most  
392 posterior cells “lock-in” to their correct fate decisions by early cycle 14, becoming refractory  
393 to further alterations of Bcd dosage. Meanwhile, more anterior genes remain sensitive to Bcd  
394 dosage for much longer periods. Therefore, this mode of temporal interpretation can cope  
395 better with a temporally dynamic morphogen gradient or fluctuations in local concentration.  
396 This temporal sequence of boundary determination may help to assure robustness of gene  
397 boundary specification within such a short developmental time.

398

### 399 **Tight coupling between transcription and morphogenesis**

400 Our optogenetic transcriptional manipulation approach brings further insights into how  
401 transcription is tightly coupled to cell specification and could be extrapolated to other  
402 analyses as morphological movements during embryogenesis. For example, we find that Bcd-  
403 dependent transcription not only determines the position of cephalic furrow invagination  
404 (Vincent et al., 1997) but also dictates the timing of when this tissue remodeling occurs  
405 (Figure S5). Finally, coupling optogenetic manipulations with light-sheet microscopy, we can  
406 spatially restrain transcriptional inhibition to one lateral side of the embryo. This locally  
407 alters cell fates, resulting in morphological defects – such as in cephalic furrow formation -  
408 while the contralateral side remains intact (Movie S2). Spatio-temporal manipulation of Bcd  
409 activity in the early embryo is thus an exciting avenue for future study.

410

411 **Acknowledgments**

412 We thank Eric Wieschaus, Thomas Gregor, Johannes Jaeger, Tiffany Cook, Thomas C.  
413 Kaufman and James Sharpe for sharing precious reagents. We acknowledge Eric Wieschaus,  
414 Enrique Martin-Blanco, James Briscoe, Philip Ingham, Shelby Blythe and all Saunders' lab  
415 members for fruitful discussions. This work was supported by the National Research  
416 Foundation Singapore under an NRF Fellowship to T.E.S. (NRF2012NRF-NRFF001-094).

417 **Author Contributions**

418 A.H., C.A. and T.E.S. designed the study. A.H. and C.A. performed the experiments, S.Z.  
419 performed the computational analysis and N. S. T. created the Bcd MiMIC mutant. A.H., C.A.  
420 and T.E.S. wrote the manuscript. All authors participated in the final version of the  
421 manuscript.

422 The authors declare no competing financial interest.

## 423 MATERIALS AND METHODS

424 **Fly stocks and genetics.** A CRY2::mCh::Bcd fusion construct was generated by replacing  
425 the eGFP sequence in the P[*egfp-bcd*] vector (Gregor et al., 2007a) by the CRY2::mCherry  
426 sequence. The original vector was digested with NheI and SphI to remove eGFP and the  
427 CRY2::mCherry sequence was amplified by PCR from the AddGene plasmid #26866  
428 (Kennedy et al., 2010) using primers appended with NheI and SphI restriction sites. The  
429 resulting P[*cry2-mcherry-bcd*] construct contained *bcd* natural 5' and 3' UTRs as well as  
430 upstream enhancers. P-element transformation was carried out by BestGene Inc. and seven  
431 transgenic lines on the 3<sup>rd</sup> chromosome were recovered. Two different lines expressing  
432 CRY2::mCh::Bcd respectively at low (CRY2<sup>low</sup>) and high (CRY2<sup>high</sup>) levels (mCherry  
433 fluorescent intensity) were employed throughout our analyses. Transcription and mRNA  
434 localization in the transformed flies was expected to recapitulate those of endogenous *bcd*.

435 A *bcd* knockout fly line was generated by CRISPR-mediated insertion of a MiMIC cassette  
436 (Venken et al., 2011) (injection performed by GenetiVision). The progenies from  
437 homozygous females phenocopied *bcd*<sup>E1</sup> developmental defects (Frohnhofer and Nüsslein-  
438 Volhard, 1986). The CRY2::mCh::Bcd (CRY2<sup>high</sup>) transgenic was recombined with the *bcd*  
439 knockout allele to establish a stable line. All experiments were carried out with this fly line  
440 unless otherwise stated.

441 Additionally, the fly line *nanos*>Gap43::mCh (Martin et al., 2010) was used for light-sheet  
442 imaging.

443 **Temporally patterned illumination.** Duration of syncytial nuclear cycles were evaluated by  
444 imaging embryos on a bright-field stereomicroscope at 25 °C. The blastoderm stage (from  
445 fertilization to the onset of gastrulation) spans 2.5 hours. The last syncytial cycle (n.c. 14),  
446 demarcated by the last division wave and the first sign of gastrulation, lasts about 45 minutes.  
447 The penultimate cycle (n.c. 13) lasts 15 minutes, while the duration of the previous three  
448 cycles (n.c. 10-12) is about 30 minutes in total. To maintain dark condition, embryos were  
449 observed or imaged with all light sources covered by amber paper (*i.e.* blocking blue light).  
450 To induce the conformational change of the CRY2 protein, we illuminated the embryos on a  
451 Nikon LED light base at 488 nm wavelength. The light intensity was measured with an  
452 intensity power meter. All experiments were carried out at 4.0 mW unless otherwise stated.  
453 For temporally patterned illumination, blastoderm stage embryos were selected in the dark  
454 condition and exposed to light. The illumination treatment of each embryo was recorded. The  
455 illumination duration was timed from the moment of light exposure until the onset of  
456 gastrulation. When the illumination treatment was followed by dark recovery, we continued  
457 the timing by observing embryos with a light source covered with amber paper until  
458 gastrulation initiated.

459 **Immunostaining.** Embryos at the desired stages were dechorionated by household bleach  
460 and fixed in heptane saturated by 37 % paraformaldehyde (PFA) for 1 hour. The vitelline  
461 membrane was subsequently manually removed. Prior to incubation with primary antibodies,  
462 embryos were blocked with 10% BSA in PBS. Image-iT@FX signal enhancer was used as  
463 blocking reagent instead of 10% BSA for Cad staining. Antibodies used were rabbit anti-  
464 mCherry (1:100, AbCam), rat anti-Caudal (1:100), guinea pig anti-Hb (1:2000), rabbit anti-  
465 Gt (1:800), guinea pig anti-Kr (1:800), guinea pig anti-Kni (1:800), guinea pig anti-Eve  
466 (1:800), guinea pig anti-Otd (1:800), mouse anti En (1:100, DSHB), rabbit anti-Dfd (1:100),  
467 mouse anti-Scr (1:10, DSHB), mouse anti-Antp (1:10, DSHB), mouse anti-Ubx (1:100,

468 DSHB) and mouse anti-Abd-B (1:100, DSHB). Primary antibodies were detected with Alexa  
469 Fluor-labelled secondary antibodies (1:500; LifeTech). Embryos were co-stained with  
470 Phalloidin conjugated with Alexa Fluor for staging purpose. Embryos were mounted in  
471 AquaMount (PolySciences, Inc.) and imaged on a Zeiss LSM710 microscope with a C-  
472 Apochromat 40x/1.2 NA water-immersion objective. Cad antibody was kindly provided by  
473 Eric Wieschaus. Hb, Gt, Kr, Kni and Eve antibodies were gifts from Johannes Jaeger. Otd  
474 was kindly given by Tiffany Cook. Last, Dfd antibody was a gift from Thomas C. Kaufman.

475 **Gradient quantification.** Images were projected using a maximum intensity projection and  
476 then nuclei segmented using Ilastik (Sommer et al., 2011). Nuclei were binned into 5mm  
477 spatial steps along the anterior-posterior axis using Matlab. Bcd nuclear intensity plots were  
478 created after background subtraction using morphological opening. Profiles fitted as  
479 described in Liu (et al., 2013).

480 **Live imaging and quantification of MS2 RNA reporter.** Embryos were collected,  
481 dechorionated and mounted on a MatTek dish under dark condition. The embryos were  
482 imaged on a custom-built Spinning Disc microscope with a Nikon Apo 40X/1.25 water-  
483 immersion objective. The pixel size is 409 nm and the image resolution is 1024x1024 pixels.  
484 At each time point a stack of 35 images separated by 3  $\mu\text{m}$  was acquired. The temporal  
485 resolution was 40 seconds. Each Z-stack for each time point was Z-projected (maximum  
486 intensity) prior to subsequent quantification. The workflow to analyze MS2 spots goes as  
487 follow: we extracted the boundary of the embryo to exclude false positive, we applied a  
488 threshold and regional intensity comparison to locate all MS2 spots and we tracked these  
489 spots using a minimal distance criterion. To refine our analysis, we considered spot tracks  
490 lasting for a minimum of 4 time frames. We plotted the probability distribution of MS2 spots  
491 persistence into 2 regions, *i.e.* the anterior and posterior domains (Fig. 2e and d). Further, we  
492 subdivided the anterior *hb* domain into five distinct regions along the AP axis, *i.e.*, 100-75,  
493 75-70, 70-65, 65-60 and 60-40 %EL. We plotted the probability distribution of MS2 spots  
494 persistence in these regions and in the posterior *hb* domain (Extended data Fig 1c and d).  
495 MS2 quantification is further described in the Supplementary Materials 1.

496 **Chromatin immunoprecipitation and qPCR.** Late n.c. 14 embryos aged in the dark or  
497 exposed to light (at 4mW) for 45 minutes were dechorionated in household bleach. Embryos  
498 were crosslinked for 15 minutes in a solution containing 2 ml of PBS, 6 ml of Heptane and  
499 180  $\mu\text{l}$  of 20% paraformaldehyde. Embryos were transferred to a 1.5 ml tube and the  
500 crosslinking was quenched with the addition of 125 mM glycine in PBS 15 min after the start  
501 of fixation. ChIP samples were essentially prepared as described in Blythe and Wieschaus,  
502 2015(Blythe and Wieschaus, 2015). Sonication was performed on a Sartorius stedim  
503 Labsonic® M with a microtip horn. An input control corresponding to 2% of the volume per  
504 reaction was taken after sonication. Immunoprecipitations (IPs) were performed with a  
505 mCherry antibody (Clonetech #632496) for 15 hours at 4°C. ChIPped DNA were extracted  
506 with a Qiaquick spin column (Qiagen). Real-time quantitative PCR was performed using  
507 SYBR® Green Assay (Thermo Fisher Scientific) on a Bio-Rad CFX96 Real-time system.  
508 Four primer pairs were used, respectively probing Hb (P2 enhancer), Gt, Otd and Kr.  
509 Additionally, a primer pair was designed 1kb downstream of the P2 enhancer (HbP2+1kb) to  
510 be used as a negative control. The percent input method ( $100 \times 2^{(\text{Adjusted input} - \text{Ct}(\text{IP}))}$ )  
511 was used to normalize ChIP-qPCR data. Further, the relative %Input for illuminated embryos  
512 was calculated as compared to the embryos in dark and summarized in a bar chart. In the case  
513 of the HbP2+1kb, data were compared to HbP2 results. Three independent replicates have  
514 been performed for each primer sets and the significance was calculated with a standard t-test.

515 **Cuticle preparation.** Embryos subjected to temporally patterned illumination were allowed  
516 to develop until the end of embryogenesis. The embryos were then dechorionated and  
517 incubated into a mixture of Hoyer's medium and Lactic acid in a 1:1 ratio at 65 °C between  
518 an imaging slide and a cover slip. For an exhaustive description of the method used see  
519 Alexandre (2008).

520 **Gap gene profile quantification.** Confocal Z-stack images were Z-projected (maximum  
521 intensity) in Fiji for further analysis. Images were rotated to orient embryos anterior left and  
522 dorsal up and rescaled to same embryo length and width. Intensity profiles along the antero-  
523 posterior axis were measured in Fiji. For Hb, the intensity profile was normalized to the peak  
524 value of the posterior domain. To determine the boundary positions of Kr and Kni expression  
525 domains, we plotted the intensity profiles along the AP axis and defined the boundary at the  
526 position with intensity equals to half of the peak value.

527 **Hemi embryo illumination on a Light-Sheet microscope.** Embryos were dechorionated as  
528 described earlier and mounted in 1% agarose on a Fluorinated ethylenepropylene (FEP)  
529 capillary (TEF-CAP, #AWG18LW-FEP). Embryos were then imaged on a custom-built  
530 Light-Sheet Microscope with a Nikon Apo 1 WD 25X/1.10 water-dipping objective.  
531 Embryos expressing CRY2::mCh::Bcd and the membrane marker Gap43::mCh were  
532 recorded using a 561nm excitation laser. The pixel size was 510 nm and the image resolution  
533 was 1024x1024 pixels. At each time point a stack of 100 images separated by 2.5 μm was  
534 acquired. The temporal resolution was 30 seconds. This illumination setup mimics dark  
535 condition as no morphological defects were observed. To stimulate CRY2 conformational  
536 change in just one half of the embryo, a region on one lateral side of the embryo was defined  
537 from the most apical section up to 70 μm down. A stack of 100 sections separated by 0.7 μm  
538 were illuminated. The illumination was carried out from the beginning of the n.c. 14 (5 min  
539 after the establishment of the cellularization furrow) for 20 min with a 488 nm laser.  
540 Following illumination, embryos were imaged solely with the 561 nm excitation laser.

541 **FIGURES**  
542

Figure 1

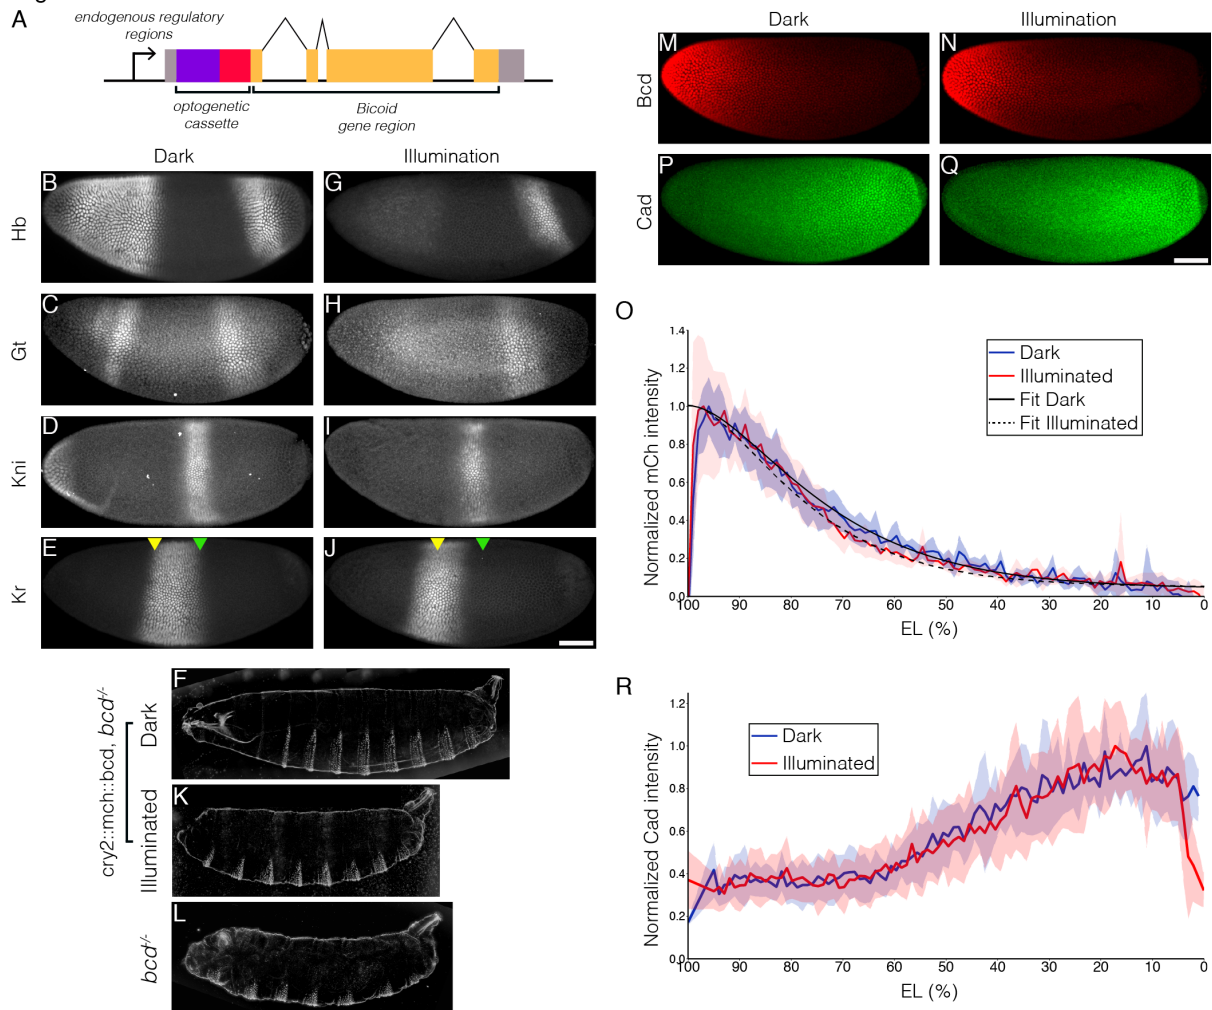

543  
544

**Figure 1. Optogenetic tool to manipulate Bcd-dependent transcription activity**

(A) Schematic illustration of *CRY2::mCh::Bcd* construct; *CRY2* optogenetic cassette tagged with mCherry fluorescent protein is fused to the N-terminal of *Bcd* coding sequence; expression of the construct is under the regulation of the endogenous *bcd* regulatory sequence. (B-J) Embryos having developed in the dark (B-E) or light (G-J) fixed at the end of the blastoderm stage and stained for Hb (B and G), Gt (C and H), Kni (D and I) and Kr (E and J). Yellow and green arrowheads indicate, respectively, the position of the anterior and posterior boundaries in the dark. (F,K and L) Cuticle patterns of embryos with maternally loaded *cry2::mch::bcd* having developed in the dark (F) or light (K) in the first 2.5 h AEL as compared to (L) *bcd*<sup>-/-</sup> embryos. (M, N, P and Q) Embryos in the dark (M and P) or light (N and Q) stained for mCh (M and N) and Cad (P and Q) at early n.c. 14. (O and R) Average nuclear intensity of *CRY2::mCh::Bcd* (O) or Cad (R) normalized to peak value is plotted vs. AP position (% EL) in dark (blue curve) and light (red curve). (O) Data were fitted to an exponential curve shown by smooth lines with length scales around 80  $\mu$ m. Shaded error bars are across all nuclei of all embryos at a given position. n = 5-7 embryos per condition. Scale bar, 50 $\mu$ m.

Figure 2

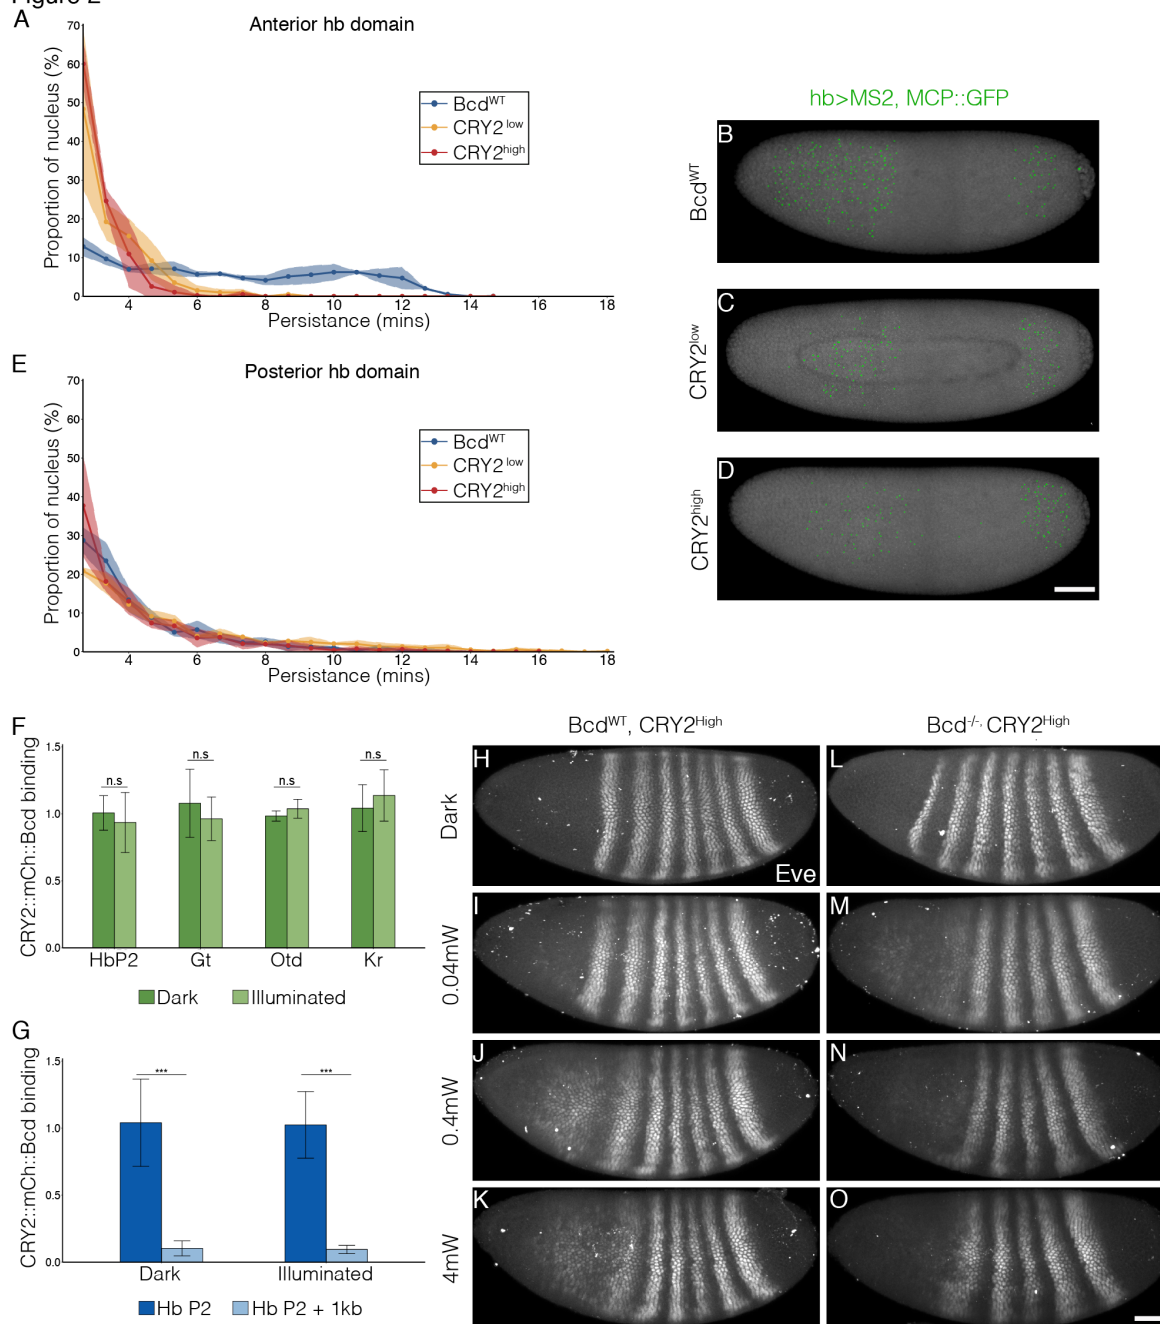

559  
560

561 **Figure 2. Inhibitory effect on Bcd-dependent transcription is gene-dosage and light-power**  
562 **dependent**

563 (A and E) Proportion of the nuclei positive for *hb* transcription plotted vs. the persistence of  
564 transcription activity during n.c. 13 in control (blue), CRY2<sup>low</sup> (orange) and CRY2<sup>high</sup> (red) embryos of  
565 *hb* anterior (A) and posterior (E) domain. n = 3 embryos per genotype. (B-D) Snapshots of embryos  
566 expressing *hb>MS2, MCP::GFP* in n.c.13. Embryos are maternally loaded with only endogenous *bcd*  
567 (B), or together with *cry2::mch::bcd* at low(C) or high (D) level. MCP::GFP signals are tracked and  
568 marked with green dots. (F and G) Chromatin immunoprecipitation quantitative PCR (ChIP-qPCR)  
569 characterization of CRY2::mCh::Bcd binding to Hb (P2 enhancer), Gt, Otd and Kr in the light for 45  
570 mins (4mW) as compared to embryos aged in the dark (F) and to 1kb downstream of the Hb P2  
571 enhancer in the dark and light conditions (G). (H-O) *Eve* staining in embryos maternally loaded with  
572 *cry2::mch::bcd* in *bcd*<sup>WT</sup> (H-K) or *bcd* null (L-O) background; embryos have developed in dark (H  
573 and L) or illuminated with blue light at 0.04mW (I and M), 0.4mW (J and N) or 4mW (K and O).  
574 Scale bar, 50µm.

Figure 3

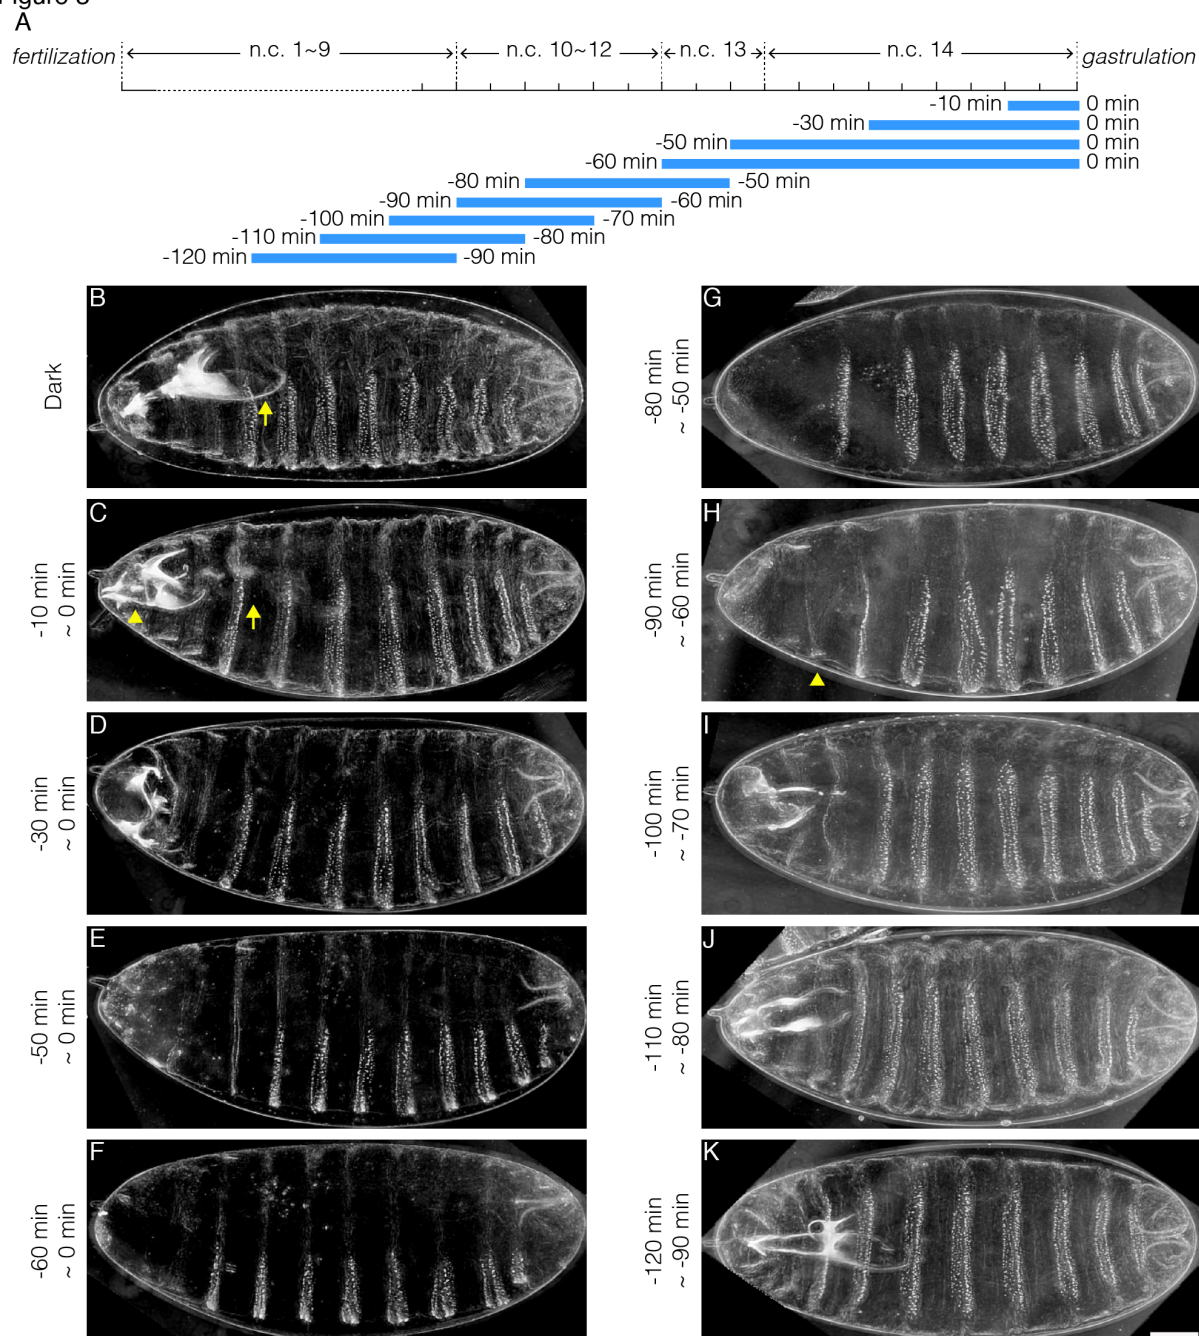

575  
576

**Figure 3. Illumination across different time windows causes embryonic lethality with varied severity**

577  
578  
579 (A) Schematic demonstration of illumination time windows. Blue bars indicate illumination while the  
580 absence of blue bars indicates dark condition. The onset of gastrulation is defined as time 0. Negative  
581 values refer to specific time before gastrulation. The start and the end of illumination is indicated by  
582 the number on the left and right side of the blue bars, respectively. (B-K) Cuticle preparation of  
583 embryos illuminated in different time windows. The illumination time is indicated on the left of each  
584 image. (B) Arrow, pharynx wall; (C) Arrow, absence of pharynx wall. Arrowhead, missing structures  
585 lying between mouth hooks and cephalo-pharyngeal plates. (K) Arrowhead, denticle belt of thorax  
586 segment. Scale bar, 50 $\mu$ m.





Figure 5

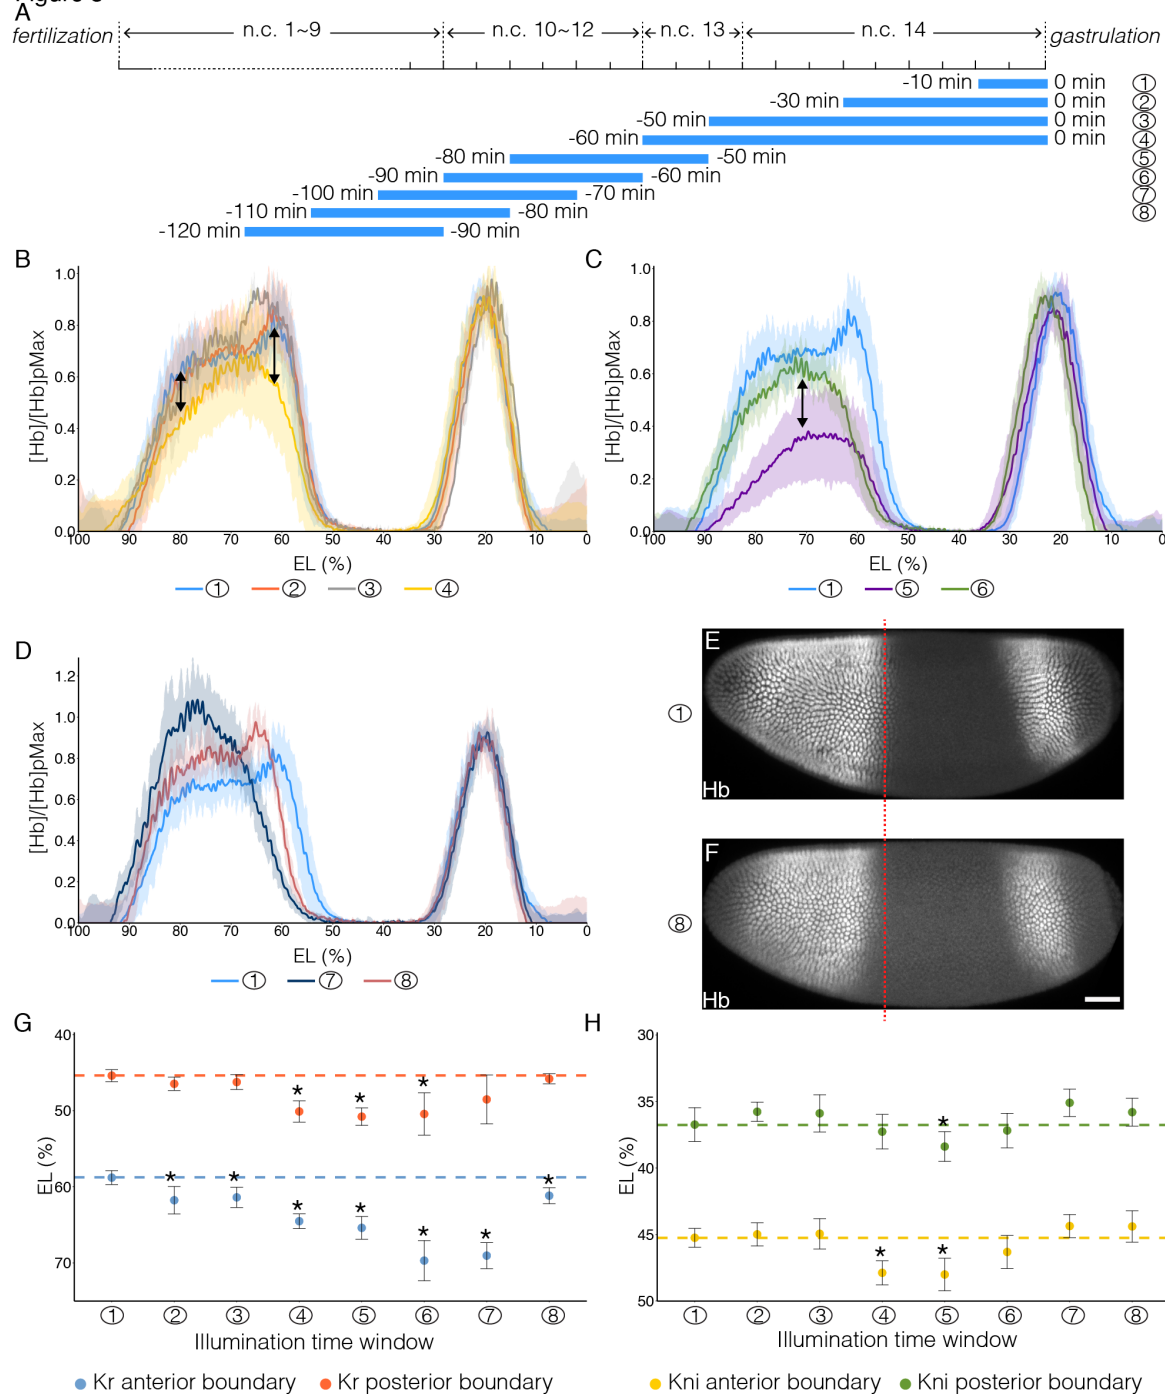

600  
601

602 **Figure 5. Impact of temporally patterned illumination on downstream gene expression**

603 (A) Schematic demonstration of eight different illumination time windows. (B-D) Average Hb  
604 intensity normalized to posterior peak values plotted vs. AP position (% EL) in embryos having  
605 developed in different temporally patterned illumination. Sample numbers correspond to time  
606 windows shown in (A). (B-C) Double-headed arrows point out the changed expression level of Hb. (E  
607 and F) Embryos having developed in dark (E) or illuminated for 30 minutes before n.c.11 (F) are  
608 stained for Hb. Red dashed line indicates the position of posterior border of anterior Hb domain of  
609 embryo in (e). Scale bar, 50µm. (G and H) Position of Kr anterior border (G, blue dots), Kr posterior  
610 border (G, red dots), Kni anterior border (H, yellow dots) and Kni posterior border (H, green dots)  
611 under different temporal illumination as indicated by sample numbers. Error bars indicate s.d.; t-test  
612 was used for the statistical evaluation with \*p<0.05. A total number of 70, 53 and 59 embryos were  
613 analyzed for expression of Hb, Kr and Kni, respectively.

Figure 6

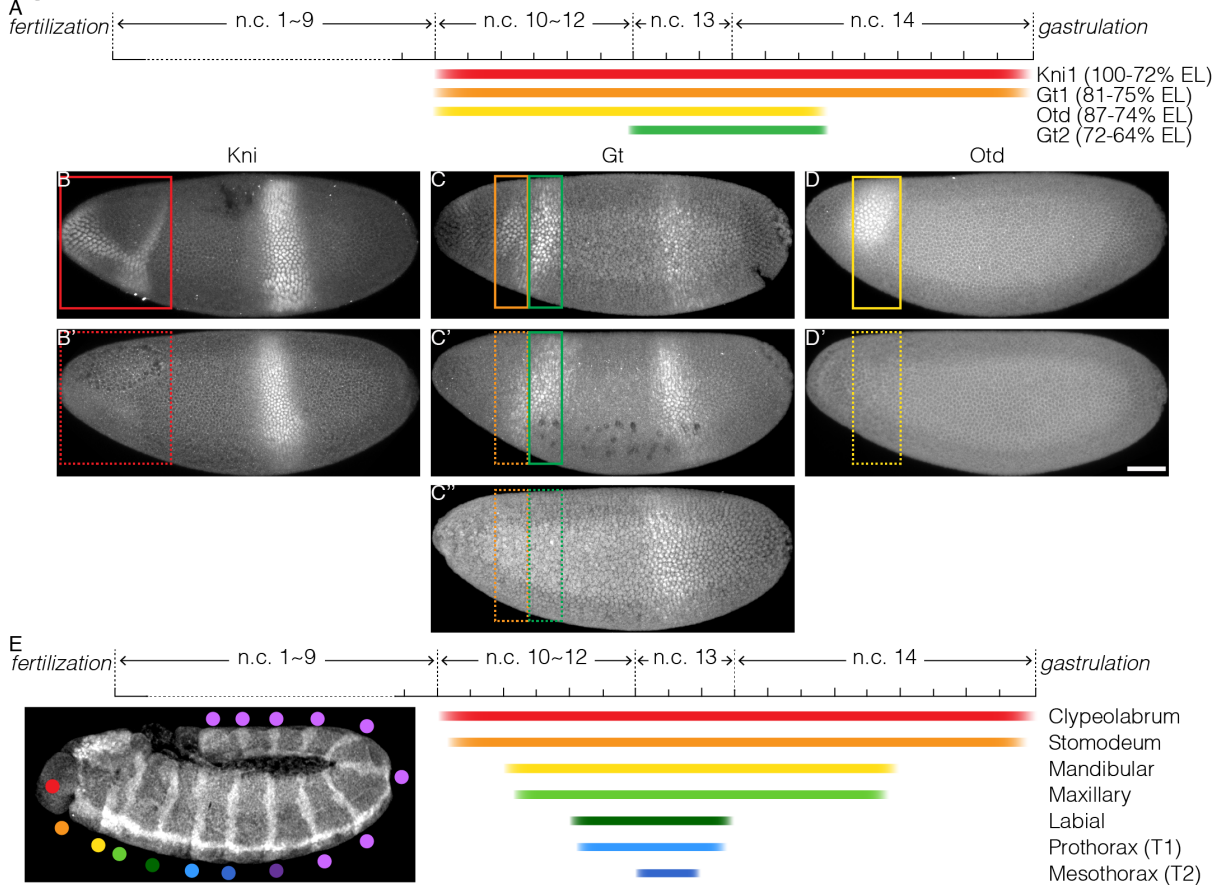

614  
615  
616  
617  
618  
619  
620  
621  
622  
623  
624  
625  
626  
627

**Figure 6. Temporal requirement of Bcd-dependent transcription for proper cell fate determination**

(A) Schematic representation of required time windows of Bcd-dependent transcription for downstream gene expression; color bars indicate the time windows required for Bcd-dependent transcription to be on for correct expression of Kni1 (red), Gt1 (orange), Otd (yellow) and Gt2 (green); (B-D) embryos exhibiting the correct gene expression when Bcd-dependent transcription is active in required time window; colored boxes point out the corresponding expression domain; (B'-D' and C'') embryos showing defects in gene expression when Bcd-dependent transcription is interrupted in required time window; dashed boxes indicate failed expression. Scale bar 50µm. (E) Schematic diagram of temporal interpretation of Bcd morphogen. Colored bars indicate the time windows required for Bcd-dependent transcription for correct cell fate determination in different embryonic segments.

Figure S1

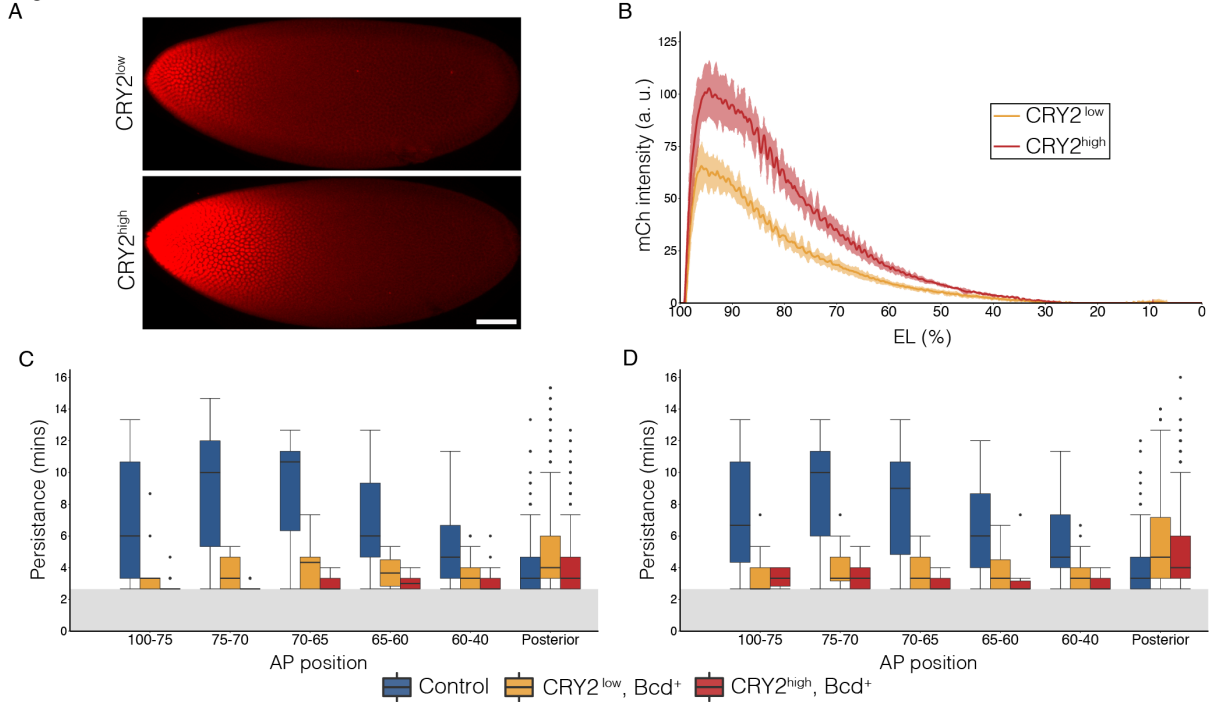

628  
629

630 **Figure S1. Expression profiles in  $CRY2^{low}$  and  $CRY2^{high}$  embryos and effect of illumination on**  
631  **$hb$  mRNA production along the AP axis**

632 (A) Snapshots of embryos expressing  $CRY2::mCh::Bcd$  at comparatively low (top panel) and high  
633 (bottom panel) level at late n.c. 14. Scale bar, 50  $\mu$ m. (B) Average nuclear mCherry intensity in  
634  $CRY2^{low}$  (orange curve) and  $CRY2^{high}$  (red curve) embryos at late n.c. 14 is plotted vs AP position (%  
635 EL). Shaded error bars are across all nuclei of all embryos at a given position.  $n = 8$  embryos for  
636  $CRY2^{low}$  and  $n = 5$  embryos for  $CRY2^{high}$ . (C and D) Box plot showing the persistence of  $hb>MS2$   
637 puncta in control (blue),  $CRY2^{low}$  (orange) and  $CRY2^{high}$  (red) embryos. Anterior  $hb$  domain is  
638 subdivided into five distinct regions along AP axis, *i.e.*, 100-75, 75-70, 70-65, 65-60 and 60-40% EL.  
639 Data is quantified in these regions as well as  $hb$  posterior domain, respectively. The cutoff value for  
640 statistical analysis is 160s as shown by the grayed regions. Each box shows the counts for a single  
641 embryo.

Figure S2

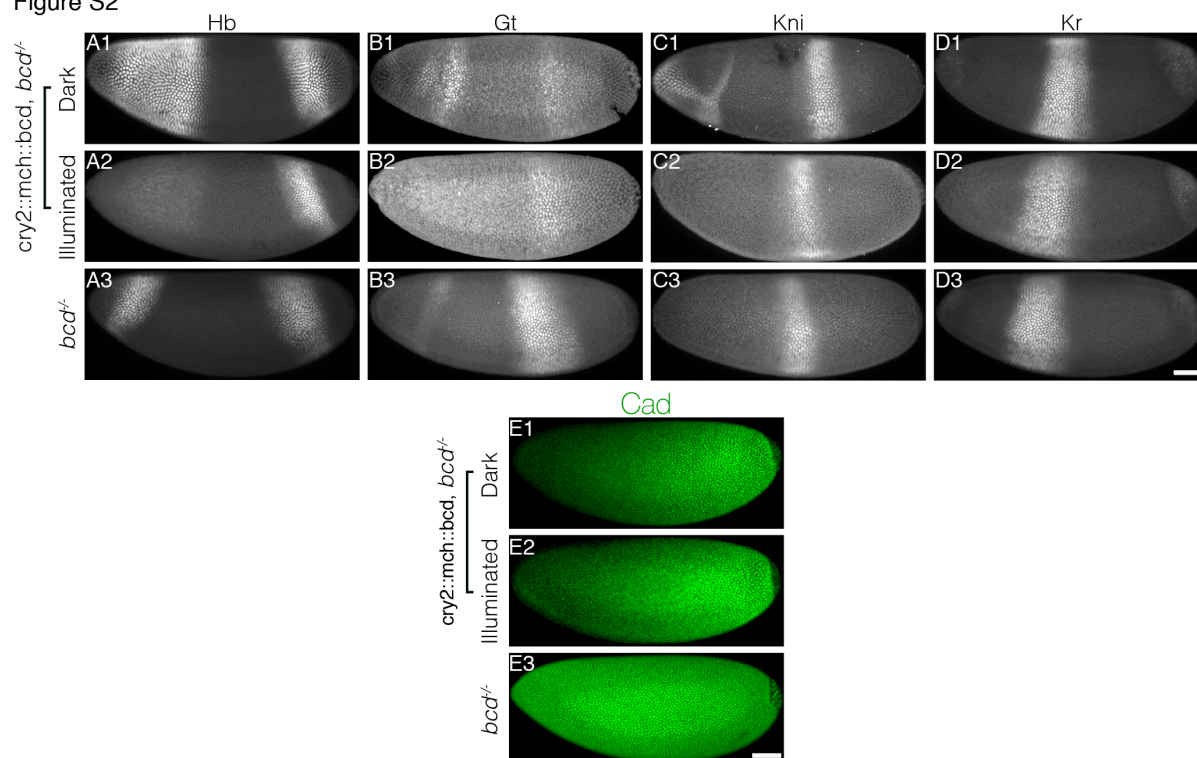

642  
643

644 **Figure S2. Comparison of gap gene and Caudal expression patterns between optogenetic and**  
645 ***bcd* mutant embryos**

646 (A-E) Embryos laid by females expressing CRY2::mCh::Bcd in a *bcd* null background having  
647 developed in the dark (A1-E1) or light (A2-E2), or by females of *bcd* mutant (A3-E3) fixed at the end  
648 of blastoderm stage and stained for Hb (A1-A3), Gt (B1-B3), Kr (C1-C3) and Kni (D1-D3), or fixed  
649 at early n.c.14 and stained for Cad (E1-E3). Scale bar, 50  $\mu$ m.

Figure S3

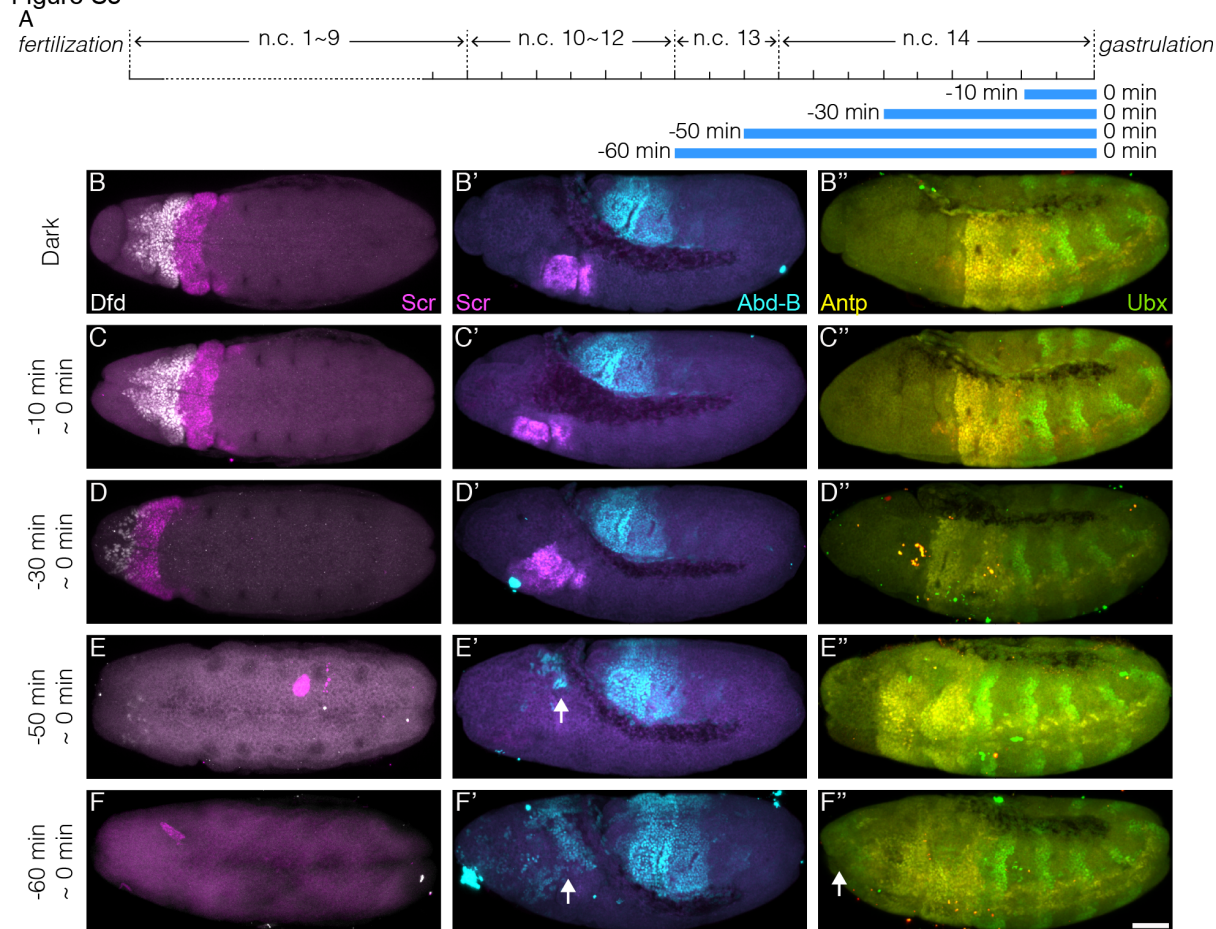

650  
651

**Figure S3. Hox genes expression pattern in increasing illumination time window**

652 (A) Schematic demonstration of illumination time windows at the end of blastoderm stage.  
653 Illumination starts at certain time before gastrulation and ends at the onset of gastrulation  
654 as indicated by blue bars. (B-F, B'-F' and B''-F'') Embryos illuminated in different time windows as indicated on  
655 the left side of each panel are fixed by the end of GBE and stained for Dfd (white) and Scr (magenta)  
656 (B-F), Scr (magenta) and Abd-B (B'-F') and Antp (yellow) and Ubx (green)(B''-F''). Panels (B-F)  
657 and (B'-F') show the unprocessed images previously shown in Figure 4. (E' and F') Arrows, ectopic  
658 Abd-B expression. (F'') Arrow, ectopic Ubx expression. Scale bar, 50  $\mu$ m.  
659

Figure S4

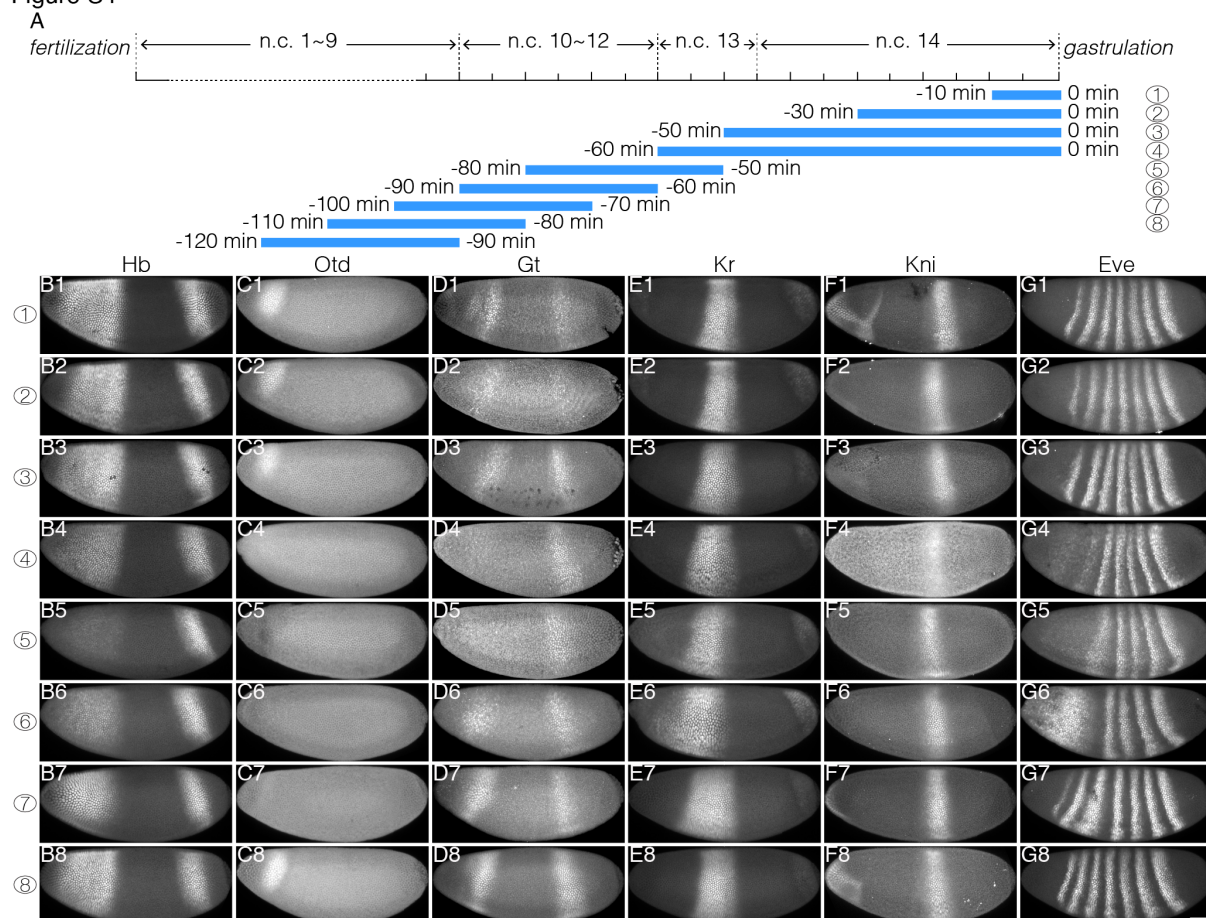

660  
661

662 **Figure S4. Impact of temporally patterned illumination on downstream gene expression**

663 (A) Schematic demonstration of eight different illumination time windows. (B-G) Embryos  
664 illuminated in different time windows are fixed at the end of blastoderm stage and stained for Hb (B1-  
665 B8), Otd (C1-C8), Gt (D1-D8), Kr (E1-E8), Kni (F1-F8), and Eve (G1-G8); row 1-8 corresponds to 8  
666 temporal illumination conditions shown in (A). Scale bar, 50  $\mu$ m.

Figure S5

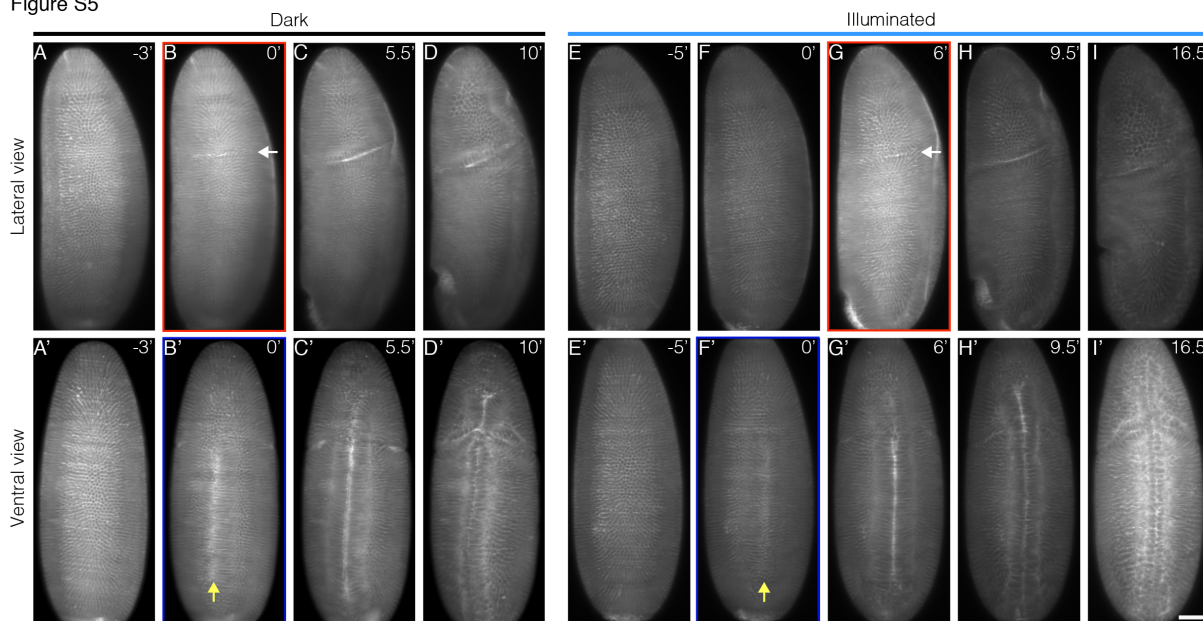

667  
668  
669  
670  
671  
672  
673  
674  
675  
676  
677

**Figure S5. Impeding Bcd-dependent transcription during cycle 14 delays cephalic furrow invagination**

Embryos expressing CRY2::mCh::Bcd and Gap43::mCh are imaged on a custom built light-sheet microscope. The embryos are illuminated with a 488nm laser for 20min starting 5min after the establishment of the cellularization furrow. Panels (A-D) and (A'-D') show respectively the lateral and ventral views for dark control embryos while (E-I) and (E'-I') show the lateral and ventral views for illuminated embryos. The red and blue rectangles indicate the time point marking the onset of cephalic furrow (white arrows) and ventral furrow (yellow arrows) invagination, respectively. Scale bar, 50  $\mu$ m.



678 **Movie S1. CRY2::mCh::Bcd expression reduces the transcription activity of hb in the anterior**  
679 **domain in blue light**

680 Embryos expressing the hb>MS2, MCP::GFP system were imaged throughout n.c. 13 and 14 with a  
681 time resolution of 40s. Rows 1, 2 and 3 show respectively Control, CRY2<sup>low</sup> and CRY2<sup>high</sup> embryos.  
682 The left column represents the raw data whilst the right column shows the segmented MS2 dots (in  
683 green) as described in the Methods section.  
684

685 **Movie S2. Bilateral cephalic furrow formation is uncoupled by single sided illumination**

686 Embryo expressing CRY2::mCh::Bcd and Gap43::mCh mounted on a custom-built Light-Sheet  
687 microscope. The embryo was mounted during n.c. 13 and Gap43::mCh was used to follow its  
688 developmental stage. Five minutes after the start of cellularization, one lateral side of the embryo was  
689 illuminated for 20min, starting from its most apical section to 70 $\mu$ m deep (0.7 $\mu$ m interval). Whole  
690 embryo recording (561nm laser) and hemi embryo illumination (488nm laser) were done  
691 simultaneously with a time resolution of 30s. The top two panels show the lateral sides of the embryo,  
692 the second panel being the illuminated one. The bottom two panels show the ventral and the dorsal,  
693 respectively.

## 694 REFERENCES

- 695 Alexandre, C. (2008). Cuticle Preparation of *Drosophila* Embryos and Larvae. *Methods Mol.*  
696 *Biol.* 197–205.
- 697 Ali-Murthy, Z., and Kornberg, T.B. (2016). Bicoid gradient formation and function in the  
698 *Drosophila* pre-syncytial blastoderm. *Elife* 5, 1–18.
- 699 Bergmann, S., Sandler, O., Sberro, H., Shnider, S., Schejter, E., Shilo, B.Z., and Barkai, N.  
700 (2007). Pre-steady-state decoding of the bicoid morphogen gradient. *PLoS Biol.* 5, 0232–  
701 0242.
- 702 Blythe, S.A., and Wieschaus, E.F. (2015). Zygotic genome activation triggers the DNA  
703 replication checkpoint at the midblastula transition. *Cell* 160, 1169–1181.
- 704 Blythe, S.A., and Wieschaus, E.F. (2016). Establishment and maintenance of heritable  
705 chromatin structure during early *Drosophila* embryogenesis. *Elife* 5, e20148.
- 706 Dessaud, E., Yang, L.L., Hill, K., Cox, B., Ulloa, F., Ribeiro, A., Mynett, A., Novitch, B.G.,  
707 and Briscoe, J. (2007). Interpretation of the sonic hedgehog morphogen gradient by a  
708 temporal adaptation mechanism. *Nature* 450, 717–720.
- 709 Dessaud, E., Ribes, V., Balaskas, N., Yang, L.L., Pierani, A., Kicheva, A., Novitch, B.G.,  
710 Briscoe, J., and Sasai, N. (2010). Dynamic assignment and maintenance of positional identity  
711 in the ventral neural tube by the morphogen sonic hedgehog. *PLoS Biol.* 8.
- 712 Driever, W., Thoma, G., and Nüsslein-Volhard, C. (1989). Determination of spatial domains  
713 of zygotic gene expression in the *Drosophila* embryo by the affinity of binding sites for the  
714 bicoid morphogen. *Nature* 340, 363–367.
- 715 Dubrulle, J., Jordan, B.M., Akhmetova, L., Farrell, J.A., Kim, S.H., Solnica-Krezel, L., and  
716 Schier, A.F. (2015). Response to Nodal morphogen gradient is determined by the kinetics of  
717 target gene induction. *Elife* 4, 1–27.
- 718 Frasch, M., and Levine, M. (1987). Complementary patterns of even-skipped and fushi tarazu  
719 expression involve their differential regulation by a common set of segmentation genes in  
720 *Drosophila*. *Genes Dev.* 1, 981–995.
- 721 Frohnhöfer, H.G., and Nüsslein-Volhard, C. (1986). Organization of anterior pattern in the  
722 *Drosophila* embryo by the maternal gene bicoid. *Nature* 324, 120–125.
- 723 Garcia, H.G., Tikhonov, M., Lin, A., and Gregor, T. (2013). Quantitative imaging of  
724 transcription in living *Drosophila* embryos links polymerase activity to patterning. *Curr. Biol.*  
725 23, 2140–2145.
- 726 Gregor, T., Tank, D.W., Wieschaus, E.F., and Bialek, W. (2007a). Probing the Limits to  
727 Positional Information. *Cell* 130, 153–164.
- 728 Gregor, T., Wieschaus, E.F., McGregor, A.P., Bialek, W., and Tank, D.W. (2007b). Stability  
729 and Nuclear Dynamics of the Bicoid Morphogen Gradient. *Cell* 130, 141–152.
- 730 Guglielmi, G., Barry, J.D., Huber, W., and De Renzis, S. (2015). An Optogenetic Method to  
731 Modulate Cell Contractility during Tissue Morphogenesis. *Dev. Cell.*
- 732 Gurdon, J.B., and Bourillot, P.Y. (2001). Morphogen gradient interpretation. *Nature* 413,  
733 797–803.
- 734 Harfe, B.D., Scherz, P.J., Nissim, S., Tian, H., McMahon, A.P., and Tabin, C.J. (2004).  
735 Evidence for an expansion-based temporal Shh gradient in specifying vertebrate digit  
736 identities. *Cell* 118, 517–528.

- 737 Hoch, M., Seifert, E., and Jäckle, H. (1991). Gene expression mediated by cis-acting  
738 sequences of the Krüppel gene in response to the Drosophila morphogens bicoid and  
739 hunchback. *EMBO J.* *10*, 2267–2278.
- 740 Hülskamp, M., Pfeifle, C., and Tautz, D. (1990). A morphogenetic gradient of hunchback  
741 protein organizes the expression of the gap genes Krüppel and knirps in the early Drosophila  
742 embryo. *Nature* *346*, 577–580.
- 743 Jaeger, J., Surkova, S., Blagov, M., Janssens, H., Kosman, D., Kozlov, K.N., Manu,  
744 Myasnikova, E., Vanario-Alonso, C.E., Samsonova, M., et al. (2004). Dynamic control of  
745 positional information in the early Drosophila embryo. *Nature* *430*, 368–371.
- 746 Johnson, H.E., Goyal, Y., Pannucci, N.L., Schüpbach, T., Shvartsman, S.Y., and Toettcher,  
747 J.E. (2017). The Spatiotemporal Limits of Developmental Erk Signaling. *Dev. Cell* *40*, 185–  
748 192.
- 749 Kennedy, M.J., Hughes, R.M., Peteya, L. a, Schwartz, J.W., Ehlers, M.D., and Tucker, C.L.  
750 (2010). Rapid blue-light-mediated induction of protein interactions in living cells. *Nat.*  
751 *Methods* *7*, 973–975.
- 752 Kraut, R., and Levine, M. (1991). Spatial regulation of the gap gene giant during Drosophila  
753 development. *609*.
- 754 Little, S.C., Tkačik, G., Kneeland, T.B., Wieschaus, E.F., and Gregor, T. (2011). The  
755 formation of the bicoid morphogen gradient requires protein movement from anteriorly  
756 localized mRNA. *PLoS Biol.* *9*.
- 757 Liu, F., Morrison, A.H., and Gregor, T. (2013). Dynamic interpretation of maternal inputs by  
758 the Drosophila segmentation gene network. *Proc. Natl. Acad. Sci. U. S. A.* *110*, 6724–6729.
- 759 Lucas, T., Ferraro, T., Roelens, B., De Las Heras Chanes, J., Walczak, A.M., Coppey, M.,  
760 and Dostatni, N. (2013). Live Imaging of Bicoid-Dependent Transcription in Drosophila  
761 Embryos. *Curr. Biol.* *23*, 2135–2139.
- 762 Lucchetta, E.M., Lee, J.H., Fu, L.A., Patel, N.H., and Ismagilov, R.F. (2005). Dynamics of  
763 Drosophila embryonic patterning network perturbed in space and time using microfluidics.  
764 *Nature* *434*, 1134–1138.
- 765 Manu, Surkova, S., Spirov, A., Gursky, V., Janssens, H., Kim, A.-R., Radulescu, O.,  
766 Vanario-Alonso, C.E., Sharp, D.H., Samsonova, M., et al. (2009). Canalization of Gene  
767 Expression in the Drosophila Blastoderm by Gap Gene Cross Regulation. *PLoS Biol.* *7*,  
768 e1000049.
- 769 Martin, A.C., Gelbart, M., Fernandez-Gonzalez, R., Kaschube, M., and Wieschaus, E.F.  
770 (2010). Integration of contractile forces during tissue invagination. *J. Cell Biol.* *188*, 735–749.
- 771 Neumann, C., and Cohen, S. (1997). Morphogens and pattern formation. *Bioessays* *19*, 721–  
772 729.
- 773 Perry, M.W., Boettiger, A.N., and Levine, M. (2011). Multiple enhancers ensure precision of  
774 gap gene-expression patterns in the Drosophila embryo. *Pnas* *108*, 1–12.
- 775 Perry, M.W., Bothma, J.P., Luu, R.D., and Levine, M. (2012). Precision of hunchback  
776 expression in the Drosophila embryo. *Curr. Biol.* *22*, 2247–2252.
- 777 Sako, K., Pradhan, S.J., Barone, V., Inglés-Prieto, Á., Müller, P., Ruprecht, V., Čapek, D.,  
778 Galande, S., Janovjak, H., and Heisenberg, C.-P. (2016). Optogenetic Control of Nodal  
779 Signaling Reveals a Temporal Pattern of Nodal Signaling Regulating Cell Fate Specification  
780 during Gastrulation. *Cell Rep.* 866–877.

- 781 Sander, K. (1976). Specification of the Basic Body Pattern in Insect Embryogenesis. *Adv. In*  
782 *Insect Phys.* *12*, 125–238.
- 783 Sommer, C., Straehle, C., Ullrich, K., and Hamprecht, F. a (2011). Ilastik: Interactive  
784 learning and segmentation toolkit. *Eighth IEEE Int. Symp. Biomed. Imaging* 230–233.
- 785 Stanojevic, D., Small, S., and Levine, M. (2016). Regulation of a Segmentation Stripe by  
786 Overlapping Activators and Repressors in the *Drosophila* Embryo. *254*, 1385–1387.
- 787 Struhl, G., Struhl, K., and Macdonald, P.M. (1989). The gradient morphogen bicoid is a  
788 concentration-dependent transcriptional activator. *Cell* *57*, 1259–1273.
- 789 Tucker, J.A., Mintzer, K.A., and Mullins, M.C. (2008). The BMP Signaling Gradient Patterns  
790 Dorsoventral Tissues in a Temporally Progressive Manner along the Anteroposterior Axis.  
791 *Dev. Cell* *14*, 108–119.
- 792 Turing, A.M. (1990). The chemical basis of morphogenesis. *Bull. Math. Biol.* *52*, 153–197.
- 793 Venken, K.J.T., Schulze, K.L., Haelterman, N. a, Pan, H., He, Y., Evans-Holm, M., Carlson,  
794 J.W., Levis, R.W., Spradling, A.C., Hoskins, R. a, et al. (2011). MiMIC: a highly versatile  
795 transposon insertion resource for engineering *Drosophila melanogaster* genes. *Nat. Methods*  
796 *8*, 737–743.
- 797 Verd, B., Crombach, A., and Jaeger, J. (2017). Dynamic Maternal Gradients Control Timing  
798 and Shift-Rates for *Drosophila* Gap Gene Expression. *PLoS Comput. Biol.* *13*, e1005285.
- 799 Vincent, A., Blankenship, J.T., and Wieschaus, E. (1997). Integration of the head and trunk  
800 segmentation systems controls cephalic furrow formation in *Drosophila*. *Development* *124*,  
801 3747–3754.
- 802 Wolpert, L. (1969). Positional information and the spatial pattern of cellular differentiation. *J.*  
803 *Theor. Biol.* *25*, 1–47.

## 1 **Supplementary material 1. Quantification of MS2 RNA reporter**

2 Nascent hb transcripts were detected from live-imaging data using both ImageJ<sup>1</sup> and Matlab.

### 3 *Image processing in ImageJ*

4 Each Z-stack for each time point was Z-projected (maximum intensity). In order to automate  
5 the tracking and subsequent analysis, the following parameters were manually measured from  
6 the projections: lowest intensity value, spot size (matrix size,  $N \times N$ ), maximum displacement  
7 distance within two frames and intensity difference between MS2 dots and surrounding  
8 background.

### 9 *Automation, tracking and analysis in Matlab*

10 The embryo boundary was automatically traced and extracted from projected images by using  
11 the 'bwboundaries' function<sup>2</sup>. This measurement was later used to exclude false positive and  
12 to calculate the coordinates for each MS2 dots. At each time frame, MS2 dots were localized  
13 by applying a threshold corresponding to the lowest intensity value. Pixels showing an intensity  
14 higher than this threshold were selected. Following the selection, the pixels out of the embryo  
15 boundary were excluded. Next, a regional intensity comparison was performed by comparing  
16 the intensity of the selected pixels to its surrounding pixels within a  $(N + 2) \times (N + 2)$  matrix  
17 window. The intensity difference between the selected pixel and the average intensity of its  
18 neighbours was calculated and pixels having a value higher than the approximate intensity  
19 difference between MS2 dots and surrounding background were selected. Central coordinates,  
20 averaged intensity value and AP position were recorded for subsequent quantification.  
21 Tracking of MS2 dots used the maximum MS2 dots displacement distance calculated above to  
22 define a displacement range. Hence, a MS2 dot at the frame  $t$  was connected to the nearest dot  
23 at the frame  $t+1$  within the displacement range. Last, we excluded dot tracks lasting less than  
24 160s as it is shorter than a complete hb transcription event. The probability distribution of MS2  
25 dots persistence in the anterior and posterior domains was calculated. The anterior domain was  
26 subdivided into 5 regions (100-75, 75-70, 70-65, 65-60 and 60-40 %EL) to refine the analysis.

27

28 1. Schindelin, J. *et al.* Fiji: an open-source platform for biological-image analysis. *Nat.*  
29 *Methods* **9**, 676–682 (2012).

30 2. Gonzalez, R. C., R. E. Woods, and S. L. Eddins, *Digital Image Processing Using*  
31 *MATLAB*, New Jersey, Pearson Prentice Hall (2004).

32

33
